1 Insulin sensitivity and PIP<sub>3</sub> turnover in *Drosophila* are regulated by  
2 phosphatidylinositol 5 phosphate 4-kinase.

3

4

5

6

7

8

9

10

11 Sanjeev Sharma\*, Swarna Mathre\*^, Ramya Visvanathan\*, Dhananjay Shinde\* and Padinjat Raghu\*%

12

13

14

15

16 \*National Centre for Biological Sciences, TIFR-GKVK Campus, Bellary Road, Bangalore 560065, India.

17 ^Manipal University, Madhav Nagar, Manipal 576104, Karnataka, India

18

19

20 % corresponding author

21 Tel: +91-80-23666102

22 E-mail: [praghu@ncbs.res.in](mailto:praghu@ncbs.res.in)

23

24

25

26

27 **Abstract**

28 Phosphatidylinositol-3,4,5-trisphosphate (PIP<sub>3</sub>) generation at the plasma membrane is a key event  
29 during activation of receptor tyrosine kinases such as the insulin receptor and is critical for normal  
30 growth and metabolism. The lipid kinases and phosphatases regulating PIP<sub>3</sub> levels are described but  
31 mechanisms that control their activity remains unclear. We report that in *Drosophila*,  
32 phosphatidylinositol 5 phosphate 4-kinase (PIP<sub>4</sub>K) regulates PIP<sub>3</sub> levels during insulin receptor  
33 activation. Depletion of PIP<sub>4</sub>K increases PIP<sub>3</sub> levels and augments sensitivity to insulin through  
34 enhanced Class I phosphoinositide 3-kinase (PI<sub>3</sub>K) activity. Plasma membrane localized PIP<sub>4</sub>K was  
35 sufficient to control PIP<sub>3</sub> levels. Animals lacking PIP<sub>4</sub>K show enhanced insulin dependent phenotypes  
36 *in vivo* and show resistance to the metabolic consequences of a high-sugar diet. Thus, PIP<sub>4</sub>K is required  
37 for normal metabolism and development. Our work defines PIP<sub>4</sub>Ks as regulators of receptor tyrosine  
38 kinase signalling with implications for growth factor dependent processes including tumour growth, T-  
39 cell activation and metabolism.

40  
41  
42  
43  
44  
45  
46  
47  
48  
49  
50  
51  
52  
53  
54  
55

56

## 57 Introduction

58 Lipid kinases that can phosphorylate selected positions on the inositol head group of  
59 phosphatidylinositol (PI), generate second messengers that regulate multiple processes in eukaryotic  
60 cells. The generation of phosphatidylinositol 3,4,5-trisphosphate (PIP<sub>3</sub>) through the action of Class I  
61 PI<sub>3</sub>K following growth factor receptor (e.g Insulin receptor) stimulation, is a widespread signalling  
62 reaction (Hawkins et al., 2006) that regulates normal growth and development (Engelman et al., 2006).  
63 The role of Class I PI<sub>3</sub>K activation in response to insulin receptor signalling is evolutionarily conserved  
64 and has been widely studied in metazoan models such as the fly, worm and mammals (Barbieri et al.,  
65 2003). Robust control of the levels and the dynamics of PIP<sub>3</sub> turnover is essential to maintain fidelity and  
66 sensitivity of information transfer during insulin signalling. This is achieved through a number of  
67 different molecular mechanisms. The Class I PI<sub>3</sub>K enzyme is a dimer of a catalytic subunit (p110) whose  
68 activity is inhibited under unstimulated conditions by the regulatory subunit (p85/50/55/60). Upstream  
69 receptor activation and subsequent binding to p-Tyr residues on the receptor and adaptor proteins  
70 relieves this inhibition. In addition, lipid phosphatases are also important in controlling PIP<sub>3</sub> levels at  
71 the plasma membrane. PTEN, a 3-phosphatase, hydrolyzes PIP<sub>3</sub> to produce PI(4,5)P<sub>2</sub> (McConnachie et  
72 al., 2003) while SHIP2 is a 5-phosphatase that generates PI(3,4)P<sub>2</sub> from PIP<sub>3</sub> (Pesesse et al., 1998). It is well  
73 documented that mutations in genes encoding any of these enzymes can be oncogenic or result in  
74 metabolic syndromes. Loss of function in PTEN or gain of function in Class I PI<sub>3</sub>K genes results in  
75 tumour development (Luo et al., 2003) while loss of SHIP2 results in altered insulin sensitivity in  
76 mammals (Clément et al., 2001; Kaisaki et al., 2004). Thus, the control of receptor-activated PIP<sub>3</sub> levels  
77 is vital to the regulation of events that direct cell growth and metabolism.

78

79 Class I PI<sub>3</sub>K enzymes utilize phosphatidylinositol 4,5-bisphosphate [PI(4,5)P<sub>2</sub>] as substrate to generate  
80 PIP<sub>3</sub>. In animal cells, the major route of PI(4,5)P<sub>2</sub> synthesis is the action of phosphatidylinositol 4  
81 phosphate 5-kinase (PIP5K), enzymes that use phosphatidylinositol 4-phosphate (PI4P) as substrate and  
82 phosphorylate position 5 of the inositol headgroup (Stephens et al., 1991). More recently, Cantley and  
83 colleagues have described a distinct class of lipid kinases, the phosphatidylinositol 5 phosphate 4-kinases  
84 (PIP4K), enzymes that utilize phosphatidylinositol 5-phosphate (PI5P) as substrate and phosphorylate  
85 position 4 to generate PI(4,5)P<sub>2</sub> (Rameh et al., 1997). Loss of PIP4Ks does not result in a drop in the mass  
86 of total cellular PI(4,5)P<sub>2</sub> but the levels of its preferred substrate, PI5P are elevated [(Gupta et al., 2013),

87 reviewed in (Kolay et al., 2016)]. In mammalian cells, three isoforms of PIP4Ks occur, viz. PIP4K2A,  
88 PIP4K2B and PIP4K2C. The phenotypes of mouse knockouts in each of these genes suggest a role for  
89 PIP4Ks in regulating receptor tyrosine kinase and PI3K signaling; deletion of PIP4K2A and PIP4K2B is  
90 able to slow tumor growth in p53<sup>-/-</sup> mice (Emerling et al., 2013); depletion of PIP4K2C results in  
91 excessive T-cell activation (Shim et al., 2016) and loss of PIP4K2B in mice results in hyper-  
92 responsiveness to insulin and a progressive loss of body weight in adults (Lamia et al., 2004). Previous  
93 studies have linked PIP4K2B to insulin and PI3K signalling. Overexpression of PIP4K2B in CHO-IR  
94 cells (expressing extremely low levels of endogenous PIP4K2B) results in reduced PIP<sub>3</sub> production  
95 following insulin stimulation (Carricaburu et al., 2003). Similarly, in U2oS cells, acute doxycycline-  
96 induced overexpression of PIP4K2A reduces AKT activation seen on insulin stimulation although  
97 changes in PIP<sub>3</sub> levels were not reported under these conditions (Jones et al., 2013). By contrast, a recent  
98 study has reported that in immortalized B-cells that carry a deletion of PIP4K2A, there is a reduction in  
99 PIP<sub>3</sub> levels following insulin stimulation (Bulley et al., 2016). Thus, although there are multiple lines of  
100 evidence suggesting a link between PIP4K and Class I PI3K signaling during insulin stimulation, the  
101 impact of the PIP4K function on PIP<sub>3</sub> levels remains unresolved.

102

103 It has been reported that loss of the only PIP4K in *Drosophila* results in a larval growth deficit and  
104 developmental delay. These phenotypes were associated with an overall reduction in the levels of  
105 pS6K<sup>T398</sup> and pAKT<sup>S505</sup>, both outputs of *mechanistic Target Of Rapamycin* (mTOR) signalling. The  
106 systemic growth defect in the dPIP4K mutants (*dPIP4K<sup>29</sup>*) could be rescued by enhancing mTOR  
107 complex 1 (TORC1) activity through pan-larval overexpression of its activator Rheb (Durán and Hall,  
108 2012; Gupta et al., 2013). Since then it has also been shown in mice that PIP4K2C can regulate TORC1  
109 -mediated signalling in immune cells (Shim et al., 2016). The loss of PIP4K2C was also shown to  
110 enhance TORC1 outputs in Tsc1/2 deficient MEFs during starvation (Mackey et al., 2014). mTOR  
111 signalling can transduce multiple developmental and environmental cues including growth factor  
112 signalling, amino acid and cellular ATP levels into growth responses (Wullschleger et al., 2006).  
113 However, the relationship between PIP4K function and its role in regulating TORC1 activity and Class  
114 I PI3K signaling remains unclear.

115

116 During *Drosophila* development, larval stages are accompanied by a dramatic increase in body size.  
117 Much of this growth occurs without increases in cell number but via an increase in cellular biomass that

118 occurs in polyploid larval tissues such as the salivary gland and fat body (Church and Robertson, 1966).  
119 One major mechanism that drives this form of larval growth is the ongoing insulin signalling;  
120 characterized by the endocrine secretion of insulin-like peptides (dILPs) from insulin-producing cells  
121 (IPCs) in the larval brain and their action on peripheral tissues through the single insulin receptor in  
122 flies (Brogiolo et al., 2001). Removal of insulin receptor (*dInR*) activity (Shingleton et al., 2005) or the  
123 insulin receptor substrate (*chico*) (Bohni et al., 1999) results in reduced growth and delayed development  
124 through multiple mechanisms. In flies, cell size in the salivary glands can be tuned by enhancing cell-  
125 specific Class I PI3K-dependent PIP<sub>3</sub> production (Georgiev et al., 2010). In this study, we use salivary  
126 glands and fat body cells of *Drosophila* larvae to study the effect of dPIP4K on insulin receptor activated,  
127 Class I PI3K signalling. We find that in *Drosophila* larval salivary gland cells, loss of *dPIP4K* enhanced  
128 the growth-promoting effects of overexpressing components of the insulin signalling pathway. dPIP4K  
129 regulates the levels of PIP<sub>3</sub> and the intrinsic sensitivity to insulin at the plasma membrane. Insulin  
130 signalling activity is regulated through negative feedback from TORC1 in cells (Gual et al., 2005; Kockel  
131 et al., 2010). This TORC1 dependent reduction in insulin-stimulated PIP<sub>3</sub> production is rendered  
132 ineffective in the absence of dPIP4K. Finally, we show that these cellular changes in insulin signalling  
133 have consequences on circulating sugar metabolism in larvae and also their susceptibility to insulin  
134 resistance on a high-sugar diet. Altogether, we demonstrate an important physiological role for dPIP4K  
135 as a negative regulator of Class I PI3K signaling during insulin stimulation in *Drosophila in vivo*.

136

137

## 138 **Results**

### 139 **dPIP4K genetically interacts with the insulin receptor signalling pathway**

140 Salivary glands are endo-replicative organs in *Drosophila* larvae that are composed of large polarized  
141 polyploid cells. Previously, we have demonstrated the use of this organ as a model to study changes in  
142 cell size (Georgiev et al., 2010; Gupta et al., 2013). Prior studies on insulin receptor signalling have  
143 revealed a role for this pathway in the autonomous control of both cell size and proliferation (Bohni et  
144 al., 1999; Brogiolo et al., 2001). However, direct evidence for such regulation in salivary glands has not  
145 been demonstrated. Therefore, as proof of principle, we depleted *dInR* levels through RNA interference  
146 (RNAi) selectively in the salivary glands of 3<sup>rd</sup> instar larvae using the driver *AB1Gal4*. As expected, this  
147 resulted in a reduction of the average size of salivary gland cells without a change in the number of cells  
148 (Fig. 1A, B, C). Likewise, overexpression of *dInR* (Fig. 1D) and *chico* (Fig. 1E) selectively in the salivary

149 glands also results in an increase in cell size. Thus, insulin receptor signalling regulates cell size in the  
150 salivary gland.

151  
152 We then compared the effect of overexpressing *dInR* in wild-type and *dPIP4K<sup>29</sup>* cells. When *dInR* was  
153 over-expressed in *dPIP4K<sup>29</sup>* (*AB1>dInR; dPIP4K<sup>29</sup>*), we also found an increase in salivary gland cell size;  
154 but the increase in cell size elicited was significantly greater than that seen in wild-type cells (*AB1>dInR*)  
155 (Compare Fig. 1H(i) and (ii)). Similar results were seen when comparing the effect of *chico*  
156 overexpression in wild-type and *dPIP4K<sup>29</sup>* cells; i.e. *chico* overexpression elicited a larger increase in cell  
157 size in *dPIP4K<sup>29</sup>* compared to wild-type (compare Fig. 1I(i) and (ii)). We reasoned that if dPIP4K  
158 specifically interacted with the early, plasma membrane components of the insulin signalling cascade,  
159 then bypassing these by constitutively activating a downstream step will abolish the differences between  
160 wild-type and *dPIP4K<sup>29</sup>* cells. In order to test this, we expressed a constitutively active form of  
161 Phosphoinositide-Dependent Kinase-1 (PDK1) (PDK1<sup>A467V</sup>) which is normally activated by PIP<sub>3</sub>  
162 downstream of insulin receptor activation and regulates cell growth (Paradis et al., 1999; Rintelen et al.,  
163 2001). Expression of PDK1<sup>A467V</sup> in salivary glands results in an increase in cell size (Fig. 1F) and this was  
164 also seen when PDK1<sup>A467V</sup> was expressed in *dPIP4K<sup>29</sup>* (Fig. 1G). However, in contrast to *dInR* and *chico*  
165 manipulations, the effect of overexpressing PDK1<sup>A467V</sup> resulted in an equivalent cell size increase in wild-  
166 type and *dPIP4K<sup>29</sup>* (Fig. 1J(i) and (ii)). These findings suggest that in *Drosophila* larval cells dPIP4K  
167 modulates insulin receptor signalling at a step that is likely to be prior to PDK1 activation.

168  
169 **PIP<sub>3</sub> levels are elevated in dPIP4K depleted larval tissues**

170 An essential early event in InR signal transduction is the activation of Class I PI<sub>3</sub>K leading to the  
171 production of PIP<sub>3</sub> at the plasma membrane (Hawkins et al., 2006). Therefore, we measured PIP<sub>3</sub> levels  
172 at the plasma membrane by imaging salivary glands from wandering third instar larvae expressing a  
173 PIP<sub>3</sub>-specific probe (GFP::PH-GRP1) (Britton et al., 2002). We observed that under basal conditions,  
174 plasma membrane PIP<sub>3</sub> in *dPIP4K<sup>29</sup>* showed a small but significant elevation compared to wild-type cells  
175 (Fig. 2A(i) and (ii)). Similar results were observed in experiments with fat body cells, i.e. PIP<sub>3</sub> levels in  
176 *dPIP4K<sup>29</sup>* fat body cells were elevated compared to wild type (Fig. 2B(i) and (ii)).

177  
178 During larval development in *Drosophila*, nutritional cues and other signals result in the release of  
179 Drosophila Insulin-like peptides (dILPs) (Nässel and Broeck, 2016) that bind to and activate dInR

180 triggering Class I PI3K activation and PIP<sub>3</sub> production. The elevated PIP<sub>3</sub> levels observed in *dPIP4K<sup>29</sup>*  
181 tissues could, therefore, result from (i) enhanced production and release of dILPs (ii) upregulation in  
182 insulin receptor levels (iii) increase in activity of insulin receptor or events downstream of receptor  
183 activation. To distinguish between these possibilities, we performed Q-PCR analysis to measure the  
184 levels of *dILP2, 3, 5* mRNAs [the levels of these are known to be transcriptionally regulated] (Brogiolo  
185 et al., 2001). We found that the transcript levels for these dILPs were not upregulated in *dPIP4K<sup>29</sup>*  
186 compared to wildtype (Fig 2C). To check for enhanced dILP release, we measured the levels of dILP2  
187 within the neurosecretory insulin-producing cells (IPCs) from the brains of wandering third instar  
188 larvae. Immunoreactivity for dILP2 produced in IPCs is expected to be lower when more of it is released  
189 into the hemolymph. We found that the average intensity of dILP2 immunostaining in the IPCs was not  
190 lower in *dPIP4K<sup>29</sup>* compared to controls; instead, it showed a small but significant increase (Fig. 2E(i)  
191 and (ii)). Thus, we found no evidence of elevated production or release of dILPs in 3<sup>rd</sup> instar larvae that  
192 might explain the increased PIP<sub>3</sub> levels observed in *dPIP4K<sup>29</sup>*. Further, we observed that *InR* receptor  
193 mRNA levels were also not different between *dPIP4K<sup>29</sup>* and wildtype indicating that levels of InR that  
194 are activated by dILPs are also not likely to be different between the two genotypes (Fig. 2D).  
195 Collectively, our experiments show plasma membrane PIP<sub>3</sub> levels to be elevated in cells lacking dPIP4K  
196 without an increase in dILP secretion or cellular insulin receptor levels.

197

#### 198 ***dPIP4K<sup>29</sup>* cells are intrinsically more sensitive to insulin stimulation.**

199 We developed *ex-vivo* assays to test the sensitivity of tissues dissected from 3<sup>rd</sup> instar larvae to stimulation  
200 with bovine insulin. It has previously been shown that *Drosophila* cells stimulated with bovine insulin  
201 respond using signal transduction elements conserved with those proposed for the canonical  
202 mammalian insulin signalling pathway (Lizcano et al., 2003). We observed that in salivary glands and  
203 fat body dissected from 3<sup>rd</sup> instar larvae, *ex-vivo* insulin stimulation triggered a rise in plasma membrane  
204 PIP<sub>3</sub> levels, measured using the GFP::PH-GRP1 probe. Following insulin stimulation (10 min, 10 μM),  
205 the rise in PIP<sub>3</sub> levels in *dPIP4K<sup>29</sup>* was higher than in wild type (Fig. 3A(i), A(ii)). This increased PIP<sub>3</sub>  
206 production was also seen in salivary gland cells (Fig. 3C(ii)) where the dPIP4K protein had been  
207 selectively depleted using salivary gland specific RNAi (Fig. 3C(i)). The increased sensitivity of *dPIP4K<sup>29</sup>*  
208 cells to *ex-vivo* insulin stimulation could be reverted by specifically reconstituting dPIP4K in salivary  
209 gland cells (Fig. 3D). Overexpression of dPIP4K in wild-type salivary gland cells resulted in reduced  
210 levels of insulin stimulated PIP<sub>3</sub> levels (Fig. 3E). A similar observation was made in fat body cells where



211 PIP<sub>3</sub> production increased with stimulation over a wide range of insulin concentrations used. Fat body  
212 lobes dissected from starved larvae were stimulated with over a 100-fold range of insulin concentrations.  
213 While 100 nM of insulin barely elicited an increase in plasma membrane PIP<sub>3</sub> levels, we observed that  
214 *dPIP4K<sup>29</sup>* fat cells show a larger rise in PIP<sub>3</sub> levels compared to the controls at higher concentrations (Fig.  
215 3C(i)-(iii)).

216

### 217 **Quantitative measurements of PIP<sub>3</sub> mass in *Drosophila* larvae**

218 To test if the probe-based imaging of PIP<sub>3</sub> in single cells indeed reflects *in vivo* changes across the animal,  
219 we refined and adapted existing protocols (Clark et al., 2011) to perform mass spectrometric  
220 measurements of PIP<sub>3</sub> from *Drosophila* whole larval lipid extracts. The amount of PIP<sub>3</sub> that has been  
221 detected and quantified from biological samples is in the range of a few tens of picomoles (Malek et al.,  
222 2017). We coupled liquid chromatography to high sensitivity mass spectrometry (LCMS) and used a  
223 Multiple Reaction Monitoring (MRM) method to detect PIP<sub>3</sub> standards for reliable quantification down  
224 to a few femtomoles (ca. 10 fmol, the lowest point in the figure inset on the standard curve in Fig. 3,  
225 Supplement 1, (A)). Since cellular lipids are composed of molecular species with varying acyl chain  
226 lengths, we first characterized the PIP<sub>3</sub> species from *Drosophila* whole larval extracts through use of  
227 neutral loss scans and thereafter quantified the abundance of these species. Fig. 3, Supplement 1, (B)  
228 depicts the elution profiles of the different PIP<sub>3</sub> species that were reproducibly detected across samples  
229 and Fig. 3, supplement 2, (A) shows the relative abundance of various PIP<sub>3</sub> species. The 34:2 PIP<sub>3</sub> species  
230 was found to be the most abundant. In a pilot experiment, we bisected whole larvae, stimulated them  
231 with insulin and measured the levels of various PIP<sub>3</sub> species between samples with and without insulin  
232 stimulation. Our LCMS method could clearly detect an increase in the levels of several PIP<sub>3</sub> species upon  
233 insulin stimulation (Fig. 3, supplement 2, (B)).

234

235 Using this method, we compared PIP<sub>3</sub> levels from whole larval lipid extracts of various genotypes  
236 following insulin stimulation. We observed that compared to controls, *dPIP4K<sup>29</sup>* larvae showed higher  
237 PIP<sub>3</sub> levels upon insulin stimulation (Fig. 3F(i), F(ii)). Similarly, upon pan-larval knockdown of dPIP4K  
238 by RNAi (Fig. 3, supplement 2, C(i)) enhanced PIP<sub>3</sub> levels were observed following insulin stimulation  
239 (Fig. 3, supplement 2, C(ii) and (iii)) although the differences were not as striking as seen in *dPIP4K<sup>29</sup>*;  
240 presumably this reflects the residual and variable amounts of dPIP4K protein seen during RNAi based  
241 knockdown (Fig. 3, supplement 2, C(i)). We also performed pan-larval rescue of dPIP4K protein in



242 *dPIP4K*<sup>29</sup> larvae and observed a rescue in levels of various PIP<sub>3</sub> species (Fig. 3, supplement 2, D(i) and  
243 D(ii)). Finally, we also depleted *dPIP4K* in *Drosophila* S2 cells (Fig. 3G(ii)) in culture using two  
244 independent dsRNA treatments and found that on insulin stimulation of serum starved cells, the total  
245 level of PIP<sub>3</sub> was enhanced compared to that in control cells (Fig. 3G(i)); the levels of individual species  
246 of PIP<sub>3</sub> underlying this elevation broadly reflected those seen in experiments with *Drosophila* larval  
247 extracts (Fig. 3G (iii)). Together, the observations from these two independent assays (fluorescent probe  
248 based PIP<sub>3</sub> measurement and mass spectrometry) suggests that in *dPIP4K* depleted cells, increased  
249 amounts of PIP<sub>3</sub> are produced at the plasma membrane during insulin stimulation, thus implying that  
250 *dPIP4K* negatively regulates PIP<sub>3</sub> production in this setting.

251

### 252 ***dPIP4K* supports TORC1-mediated feedback inhibition on insulin receptor signalling**

253 We had previously reported a systemic reduction in TORC1 activity in *dPIP4K*<sup>29</sup> larvae. It is well  
254 understood in mammalian cells that TORC1 activation can mediate feedback inhibition on insulin  
255 receptor substrate (IRS) through phosphorylation to suppress insulin signalling. In *Drosophila*, such  
256 feedback inhibition has been partly demonstrated (Kockel et al., 2010), though its precise mechanism is  
257 unclear. To understand if there was a relationship between reduced TORC1 output (Gupta et.al, 2013)  
258 and the increased insulin-stimulated PIP<sub>3</sub> production in *dPIP4K*<sup>29</sup> cells (*this study*), we studied the effect  
259 of tissue-specific manipulation of TORC1 activity on insulin-stimulated PIP<sub>3</sub> production in salivary  
260 gland cells. For this, we down-regulated Rheb, the GTPase that directly binds and activates TORC1 (Tee  
261 et al., 2003). In *AB1>Rheb*<sup>RNAi</sup> glands, cell size is substantially reduced consistent with the known  
262 requirement for TORC1 signalling in regulating cell size (Fig. 4A (i)). Following insulin stimulation of  
263 *AB1>Rheb*<sup>RNAi</sup> glands, PIP<sub>3</sub> levels at the plasma membrane were elevated compared to controls (Fig. 4A  
264 ii). Conversely, we compared PIP<sub>3</sub> production in control cells and those selectively overexpressing Rheb  
265 (*AB1>dRheb*) that is expected to enhance TORC1 signalling activity. Following insulin stimulation, the  
266 levels of PIP<sub>3</sub> generated were significantly lower in *AB1>dRheb* glands compared to controls (Fig. 4B (i),  
267 (ii)). Similarly, knockdown of TSC, the GTPase activating protein (GAP) for Rheb, expected to result in  
268 hyperactivation of Rheb (Zhang et al., 2003), also reduces the PIP<sub>3</sub> levels seen post insulin stimulation  
269 (Fig. 4C (i), (ii)). Thus, TORC1 output can control plasma membrane PIP<sub>3</sub> levels during insulin  
270 signaling in salivary gland cells.

271

272 We also tested the requirement for dPIP<sub>4</sub>K in TORC<sub>1</sub>-mediated control of PIP<sub>3</sub> levels during insulin  
273 stimulation. When dPIP<sub>4</sub>K function is reconstituted in salivary glands (*AB1>dPIP4K; dPIP4K<sup>29</sup>*), as  
274 expected, normal levels of insulin-stimulated PIP<sub>3</sub> production were restored (refer Fig. 3D). Knockdown  
275 of *dRheb* in salivary glands resulted in a further elevation of insulin-stimulated PIP<sub>3</sub> levels over that seen  
276 in *dPIP4K<sup>29</sup>* (Fig. 4D(i), (ii)). However, when *dRheb* was overexpressed in *dPIP4K<sup>29</sup>* salivary glands;  
277 (*AB1>dRheb; dPIP4K<sup>29</sup>*), surprisingly, we found that insulin-stimulated PIP<sub>3</sub> levels were not lower than  
278 in *AB1>; dPIP4K<sup>29</sup>* (Fig. 4E (i), (ii)). Likewise, depletion of TSC in *dPIP4K<sup>29</sup>* (*AB1>Tsc<sup>RNAi</sup>; dPIP4K<sup>29</sup>*) did  
279 not lower insulin stimulated PIP<sub>3</sub> levels (Fig. 4F (i), (ii)). Thus, dPIP<sub>4</sub>K function facilitates TORC<sub>1</sub>-  
280 mediated feedback inhibition of PIP<sub>3</sub> levels during insulin stimulation. Upon loss of dPIP<sub>4</sub>K, the  
281 inhibitory action of TORC<sub>1</sub>-mediated feedback upon insulin signalling is insufficient to generate  
282 normal levels of PIP<sub>3</sub>.

283

#### 284 **PIP<sub>4</sub>K is required at the plasma membrane to control of insulin-stimulated PIP<sub>3</sub> production**

285 We and others have previously shown that PIP<sub>4</sub>Ks localize to multiple subcellular membrane  
286 compartments (Clarke et al., 2010; Gupta et al., 2013). It is also reported that the substrate for this  
287 enzyme i.e. PI<sub>5</sub>P is present on various organellar membranes inside cells (Sarkes and Rameh, 2010). To  
288 further probe the mechanism of regulation of PIP<sub>3</sub> levels by dPIP<sub>4</sub>K, we decided to identify the sub-  
289 cellular compartment at which dPIP<sub>4</sub>K function is required to regulate PIP<sub>3</sub> levels. We generated  
290 transgenic flies to target dPIP<sub>4</sub>K to specific subcellular compartments (Fig. 5A). Using unique signal  
291 sequences, we targeted dPIP<sub>4</sub>K specifically to the plasma membrane (Fig. 5B (ii)), endomembrane  
292 compartments viz. the ER and Golgi (Fig. 5B (iii)) and the lysosomes (Fig. 5B (iv)). Lysates from S2R+  
293 cells expressing these constructs for assayed for PIP<sub>4</sub>K activity and we found that all of the targeted  
294 dPIP<sub>4</sub>K enzymes were active (Fig. 5C(i), C(ii)); activity was proportional to the amount of protein  
295 expressed. Each of these targeted dPIP<sub>4</sub>K constructs were selectively reconstituted into dPIP<sub>4</sub>K null  
296 (*dPIP4K<sup>29</sup>*) cells and tested for its ability to revert the enhanced insulin-stimulated PIP<sub>3</sub> production of  
297 *dPIP4K<sup>29</sup>*. For this, we stimulated dissected salivary glands *ex-vivo* with insulin and measured PIP<sub>3</sub>  
298 production using the GFP::PH-GRP1 probe. Under these conditions, while endomembrane (Fig. 5E)  
299 and lysosome-targeted (Fig. 5F) dPIP<sub>4</sub>K failed to revert the elevated PIP<sub>3</sub> levels of *dPIP4K<sup>29</sup>*,  
300 reconstitution with the plasma-membrane targeted dPIP<sub>4</sub>K completely restored the elevated PIP<sub>3</sub> levels  
301 in *dPIP4K<sup>29</sup>* to that of controls (Fig. 5D). Further, overexpression of plasma-membrane targeted dPIP<sub>4</sub>K  
302 in wildtype salivary gland cells resulted in lower insulin stimulated PIP<sub>3</sub> levels compared to the controls

303 at 5 mins post insulin stimulation (Fig. 5G). These observations suggest that plasma membrane localized  
304 dPIP<sub>4</sub>K is sufficient to regulate insulin-stimulated PIP<sub>3</sub> production.

305

306 We also tested the ability of plasma membrane localized PIP<sub>4</sub>K to regulate PIP<sub>3</sub> production during  
307 insulin signalling. In a previous study, overexpression of human PIP<sub>4</sub>K2B in CHO-IR cells was shown  
308 to reduce the levels of pAKT<sup>T308</sup>, an important PIP<sub>3</sub> dependent signalling event during insulin  
309 stimulation (Carricaburu et al., 2003). We tested the effect of overexpressing plasma membrane  
310 restricted PIP<sub>4</sub>K2B in these cells on pAKT<sup>T308</sup> during insulin stimulation. We generated a PIP<sub>4</sub>K2B  
311 construct with a CAAX-motif at its C-terminus (PIP<sub>4</sub>K2B::mCherry<sup>CAAX</sup>) that localized the enzyme to  
312 the plasma membrane as expected, while the wildtype PIP<sub>4</sub>K2B (PIP<sub>4</sub>K2B::eGFP) can be seen at various  
313 subcellular compartments (Fig. 5H(i)). CHO-IR cells transiently overexpressing either PIP<sub>4</sub>K2B::eGFP  
314 or PIP<sub>4</sub>K2B::mCherry<sup>CAAX</sup> were serum starved, stimulated with insulin and pAKT<sup>T308</sup> was measured  
315 through immunoblotting. As previously reported, we found that PIP<sub>4</sub>K2B::eGFP overexpression  
316 resulted in a small but significant decrease in pAKT<sup>T308</sup> (Fig. 5H'). Interestingly, consistent with our  
317 findings in *Drosophila* larval cells, we observed that over-expressed PIP<sub>4</sub>K2B::mCherry<sup>CAAX</sup> also caused  
318 a decrease in pAKT<sup>T308</sup>. In fact, this decrease was achieved despite lower levels of expression of  
319 PIP<sub>4</sub>K2B::mCherry<sup>CAAX</sup> compared to the wildtype protein. Thus, PIP<sub>4</sub>K2B activity at the plasma  
320 membrane is sufficient to negatively regulate PIP<sub>3</sub> dependent pAKT<sup>T308</sup> levels in mammalian cells.

321

### 322 dPIP<sub>4</sub>K alters PIP<sub>3</sub> turnover by modifying Class I PI<sub>3</sub>K activity

323 PIP<sub>3</sub> levels at the plasma membrane upon insulin stimulation also depend on the length of time the  
324 receptor remains activated. Our 10-min stimulation protocol was based on earlier studies performed on  
325 *Drosophila* S2 cell-cultures where the response to insulin was maximal at 10 min (Lizcano et al., 2003).  
326 However, in order to check for any differences in the dynamics of response to insulin, we also studied  
327 the time course of PIP<sub>3</sub> elevation following increasing times of insulin stimulation *ex-vivo*. Comparison  
328 of fixed preparations of salivary glands expressing GFP-PH-GRP1 probe showed a comparable time  
329 course of PIP<sub>3</sub> elevation but higher PIP<sub>3</sub> levels at every time point in *dPIP4K*<sup>29</sup> than in control glands  
330 (Fig. 6, Supplement 1, (i) and (ii)). To understand the effect of dPIP<sub>4</sub>K on insulin signaling at the plasma  
331 membrane with increased temporal resolution, we developed a live-imaging assay to follow the  
332 dynamics of PIP<sub>3</sub> turnover using the PH-GRP1 probe in salivary gland cells. A schematic of the reactions  
333 involved in the process and the assay protocol is depicted in Fig. 6A(i) and (ii). In this assay, during

334 insulin stimulation, the dynamics of PIP<sub>3</sub> turnover has three phases – (i) Rise phase – PIP<sub>3</sub> levels increase  
335 after a stimulus owing to the activation of PI<sub>3</sub>K and relatively lower phosphatase activity (ii) Steady-  
336 state phase – the opposing kinase and phosphatase activities regulating PIP<sub>3</sub> levels balance out each other  
337 (iii) Decay phase - PI<sub>3</sub>K activity is irreversibly inhibited by wortmannin while PIP<sub>3</sub> phosphatases remain  
338 active. A single experimental trace is shown in Fig. 6B (i); insulin stimulation triggers a rise in PIP<sub>3</sub> levels  
339 that peak and subsequently decline. Addition of wortmannin prior to addition of insulin abolished  
340 insulin stimulated PIP<sub>3</sub> production establishing the effectiveness of Class I PI<sub>3</sub>K inhibition in this assay  
341 (Fig. 6B(ii)).

342  
343 We tested the effect of loss of dPIP<sub>4</sub>K and tissue-specific overexpression of dPIP<sub>4</sub>K on PIP<sub>3</sub> turnover.  
344 Loss of dPIP<sub>4</sub>K resulted in higher steady state levels of PIP<sub>3</sub> in salivary gland cells compared to controls  
345 (Fig. 6C) while overexpression of dPIP<sub>4</sub>K resulted in lower steady-state levels of PIP<sub>3</sub> (Fig. 6D). These  
346 findings are consistent with the results from our imaging of PIP<sub>3</sub> levels from fixed salivary glands of  
347 these genotypes (see Fig 3 A(ii) and E). We also analyzed the rate of change in PIP<sub>3</sub> levels during the  
348 initial phase following insulin stimulation. This analysis clearly revealed an enhanced rate of PIP<sub>3</sub>  
349 production on loss of *dPIP4K*<sup>29</sup> relative to controls and a reduced rate of PIP<sub>3</sub> production in cells  
350 overexpressing this enzyme (Fig. 6E(i)). Thus, dPIP<sub>4</sub>K has the ability to modulate the rate of PIP<sub>3</sub>  
351 production during insulin stimulation. A similar analysis of the rate of decrease in PIP<sub>3</sub> levels during the  
352 phase after wortmannin addition (i.e when Class I PI<sub>3</sub>K activity has been inhibited) showed a marginally  
353 slower rate of decay in PIP<sub>3</sub> levels in both dPIP<sub>4</sub>K depleted cells relative to controls but also in cells  
354 overexpressing dPIP<sub>4</sub>K (Fig. 6E(ii)). This finding implies that dPIP<sub>4</sub>K function is also able to modulate  
355 the PIP<sub>3</sub> phosphatase activity operative during insulin signalling in *Drosophila* salivary gland cells  
356 although less substantially than its effect on Class I PI<sub>3</sub>K activity.

357  
358 ***dPIP4K* function regulates sugar metabolism during larval development.**

359 We tested if increased sensitivity to insulin seen in *dPIP4K*<sup>29</sup> had any impact on the physiological  
360 response of the animals to sugar intake. It has previously been reported that larvae raised on a high sugar  
361 diet (HSD) develop an insulin resistance phenotypes reminiscent of Type II diabetes (Musselman et al.,  
362 2011; Pasco and Léopold, 2012). At the level of the organism, this includes reduced body weight, a  
363 developmental delay and elevated levels of hemolymph trehalose, the main circulating sugar in insect  
364 hemolymph. As previously reported, we found that when grown on HSD (1M sucrose), wild-type larvae

365 show ca. 9 days delay in development compared to animals grown on normal food (0.1M Sucrose) (Fig.  
366 7A). However, interestingly, in *dPIP4K<sup>29</sup>* larvae grown on HSD a delay of only 5 days was seen compared  
367 to the same genotype grown on 0.1M sucrose (Fig. 7A). We also biochemically measured the levels of  
368 circulating trehalose in the hemolymph of wandering third instar larvae. It was observed that *dPIP4K<sup>29</sup>*  
369 larvae raised on normal food, showed circulating trehalose levels are ca. 40% lower compared to controls.  
370 Further, when wild-type animals were grown on HSD, circulating trehalose levels in larvae were elevated  
371 by ca. 25 % compared to that on normal food (Fig. 7B). However, when *dPIP4K<sup>29</sup>* larvae were raised on  
372 HSD, circulating trehalose levels remained essentially unchanged (Fig. 7B) compared to that in animals  
373 grown on normal food. Together, these observations suggest that loss of dPIP4K in larvae confers partial  
374 protection against phenotypes that arise when challenged with a high sugar diet.

375

## 376 Discussion

377 The generation of PIP<sub>3</sub> is a conserved element of signal transduction by many growth factor receptors.  
378 The enzymes that control PIP<sub>3</sub> levels during this process, namely Class I PI3K and the lipid phosphatases  
379 PTEN and SHIP2 are well studied and the biological consequences of mutations in genes encoding these  
380 enzymes underscore the importance of tight regulation of PIP<sub>3</sub> levels during growth factor signalling.  
381 While the roles of many of the core enzymes that are directly involved in PIP<sub>3</sub> metabolism have been  
382 studied extensively, the function of proteins that regulate their activity remains less understood; to date  
383 regulation of Class I PI3K activity by small GTPases (Ras, Rac) and G<sub>βγ</sub> subunits has been described  
384 [reviewed in (Hawkins and Stephens, 2015)]. Although a role for PIP4K enzymes in regulating growth  
385 factor signalling through PIP<sub>3</sub> generation has been reported by several studies (Bulley et al., 2016;  
386 Carricaburu et al., 2003; Lamia et al., 2004), the biochemical mechanism and cell-biological context in  
387 which they do so has remained obscure. PIP4Ks convert PI5P to PI(4,5)P<sub>2</sub> but to date no study has found  
388 a role for PIP4K in regulating overall cellular PI(4,5)P<sub>2</sub> levels [reviewed in (Kolay et al., 2016)]. One  
389 possibility that has been raised is that PIP4Ks may generate the PI(4,5)P<sub>2</sub> pool from which PIP<sub>3</sub> is  
390 produced by Class I PI3K activity. Although PI5P, the preferred substrate of PIP4K, is a low abundance  
391 lipid, in principle, it is possible that a small, local pool of PI(4,5)P<sub>2</sub> is generated from PI5P by PIP4K and  
392 the loss of this small pool of PI(4,5)P<sub>2</sub> is not detected by the mass assays for estimating total cellular  
393 levels of this lipid. Quantitatively, based on their relative abundance, the small PIP4K generated pool of  
394 PI(4,5)P<sub>2</sub> is likely to be sufficient to serve as the substrate for PIP<sub>3</sub> generation by Class I PI3K. A recent  
395 study (Bulley et al., 2016) has reported that PIP<sub>3</sub> levels are reduced in immortalized B-cells in which

396 PIP4K2A activity is down regulated. By contrast, it has been previously reported that loss of PIP4K2B  
397 in mice results in increased levels of insulin signalling readouts such as pAKT<sup>308</sup> that are direct correlates  
398 of PIP<sub>3</sub> levels (Lamia et al., 2004). The exact reasons for these conflicting results is unclear and may  
399 include the different cell types used in each study; a key reason is likely to be the overlapping function  
400 of the three PIP4K isoforms present in mammalian genomes. In this study, we found that in *Drosophila*,  
401 that contains only a single gene encoding PIP4K activity (dPIP4K)(Balakrishnan et al., 2015; Gupta et  
402 al., 2013), the levels of plasma membrane PIP<sub>3</sub> in cells lacking dPIP4K were elevated compared to  
403 controls. We established this finding using both a fluorescent reporter for plasma membrane PIP<sub>3</sub> in  
404 single cell assays using multiple cell types and also using lipid mass spectrometry across larval tissues  
405 and cultured, dPIP4K depleted *Drosophila* S2 cells. Thus, our study clearly demonstrates that in  
406 *Drosophila*, dPIP4K function is a negative regulator of PIP<sub>3</sub> production during growth factor  
407 stimulation. The elevated PIP<sub>3</sub> levels seen when dPIP4K is depleted are not consistent with a role for this  
408 enzyme in generating the PI(4,5)P<sub>2</sub> at the plasma membrane used by Class I PI3K as substrate to  
409 generate PIP<sub>3</sub> during insulin signalling. Therefore, it is likely that dPIP4K regulates PIP<sub>3</sub> levels through its  
410 ability to control the function of proteins that themselves regulate PIP<sub>3</sub> levels during Class I PI3K  
411 signalling.

412  
413 In an earlier study (Gupta et al., 2013), we had observed *dPIP4K*<sup>29</sup> larvae to have systemically reduced  
414 levels of TOR activation. In mammalian cells, reducing TOR activity through the use of rapamycin or a  
415 loss of S6K, a direct target of TORC1, leads to increased activation of insulin signalling pathway and  
416 obesity resistance which was associated with increased insulin sensitivity (Haruta et al., 2000; Reilly et  
417 al., 2011; Um et al., 2004). It is also reported that S6K inactivates IRS-1 by phosphorylating it on multiple  
418 serine residues (Gual et al., 2005; Tremblay et al., 2007). Therefore, it is reasonable to hypothesize a  
419 scenario where the reduced TORC1 activity in *dPIP4K*<sup>29</sup> cells may be the defect that drives the increase  
420 in the levels of PIP<sub>3</sub> in *dPIP4K*<sup>29</sup>. An alternative explanation of our observations is that loss of dPIP4K  
421 could uncouple the negative feedback from TORC1 activity to PIP<sub>3</sub> generation at the plasma membrane.  
422 In this study, we found that in wild-type larval cells, modulating TORC1 activity could tune PIP<sub>3</sub> levels  
423 during insulin stimulation (Fig 4 A-C); enhancing TORC1 output resulted in lower levels of insulin-  
424 induced PIP<sub>3</sub>, whereas reducing TORC1 activity caused higher levels of PIP<sub>3</sub>. By contrast, overexpression  
425 of Rheb or the down-regulation of Tsc1/2 was not able to revert the elevated plasma membrane PIP<sub>3</sub>  
426 levels in *dPIP4K*<sup>29</sup> cells (Fig 4 E-F) although they were able to restore the reduced cell size in *dPIP4K*<sup>29</sup>



427 (Fig. 4, Supplement 1, (A) and (B)). These results imply two conclusions: 1) Decreased TORC1 activity  
428 is not sufficient to explain the enhanced PIP<sub>3</sub> levels in *dPIP4K<sup>29</sup>* larval cells and 2) Efficient feedback  
429 regulation of PIP<sub>3</sub> levels by TORC1 outputs following Rheb activation requires intact dPIP4K function.

430

431 Binding of insulin to its receptor triggers a signalling cascade where the initial events occur at the plasma  
432 membrane. These involve interaction of the activated insulin receptor-ligand complex with IRS followed  
433 by the recruitment and activation of Class I PI3K at the plasma membrane. At which sub-cellular  
434 location is dPIP4K activity required to regulate this process? Fractionation and immunolocalization  
435 studies in mammalian cells (Clarke et al., 2010) and *Drosophila* (Gupta et al., 2013) have indicated that  
436 PIP4K isoforms are distributed across multiple subcellular compartments including the plasma  
437 membrane, nucleus and internal vesicular compartments. In this study, using selective reconstitution of  
438 the dPIP4K to specific membrane compartments, in cells devoid of any endogenous PIP4K protein, we  
439 found that plasma membrane targeted dPIP4K could rescue the elevated PIP<sub>3</sub> levels in dPIP4K null cells.  
440 This observation strongly suggests that the plasma membrane localized dPIP4K is sufficient to control  
441 PIP<sub>3</sub> production during insulin stimulation. Our observation that *dPIP4K<sup>29</sup>* cells were hypersensitive to  
442 overexpression of *dINR* or *chico* compared to wild-type cells likely reflects the loss of a dPIP4K  
443 dependent event in the control of PIP<sub>3</sub> levels at the plasma membrane. Overexpression of plasma-  
444 membrane localized PIP4K2B was able to reduce pAKT<sup>308</sup> phosphorylation upon insulin stimulation in  
445 mammalian cells just as well as the wildtype PIP4K2B enzyme. Our finding of a role for the plasma  
446 membrane localized PIP4K in regulating PIP<sub>3</sub> levels in both *Drosophila* and mammalian cells  
447 underscores the evolutionarily conserved nature of this mechanism. Previous studies have shown that  
448 levels of PI5P, the substrate for PIP4Ks, increases upon insulin stimulation and importantly, addition of  
449 exogenous PI5P can stimulate glucose uptake in a PI3K-dependent manner (Grainger et al., 2011; Jones  
450 et al., 2013). Therefore, plasma membrane localized PIP4K and the levels of its substrate PI5P could be  
451 a mechanism by which early events during insulin signalling are regulated.

452 What molecular event involved in PIP<sub>3</sub> turnover might dPIP4K regulate at the plasma membrane? Using  
453 live cell imaging studies of PIP<sub>3</sub> turnover at the plasma membrane coupled with chemical inhibition of  
454 Class I PI3K, we were able to observe that dPIP4K function has a substantial impact on the rate of PIP<sub>3</sub>  
455 production following insulin stimulation whereas the rate of PIP<sub>3</sub> degradation was only marginally  
456 affected. This finding suggests that dPIP4K likely regulates the activity of Class I PI3K either directly or



457 by controlling its coupling to the activated insulin receptor complex at the plasma membrane; the  
458 mechanism by which it does so remains to be established.

459

460 What might be the physiological consequence of losing dPIP<sub>4</sub>K mediated feedback control on PIP<sub>3</sub>  
461 production in the context of insulin signalling? Previous studies in mouse and human cells have reported  
462 that excessive activation of TORC<sub>1</sub> signalling leads to inactivation of insulin signalling pathway and  
463 development of insulin resistance (Harrington et al., 2004; Shah et al., 2004; Tzatsos and Kandrór, 2006).  
464 Since TORC<sub>1</sub> activity is reduced (Gupta et al., 2013) and PIP<sub>3</sub> were elevated (this study) in animals  
465 lacking dPIP<sub>4</sub>K, it is likely that loss of dPIP<sub>4</sub>K impacts sugar metabolism in *Drosophila* larvae. Using a  
466 recently reported high-sugar induced obesity and Type II diabetes-like disease model in *Drosophila*  
467 (Musselman et al., 2011), we found that *dPIP4K<sup>29</sup>* larvae appear resistant to a high sugar diet as measured  
468 by the elevation in the hemolymph trehalose levels and they were relatively resistant to the  
469 developmental delay seen when wild-type larvae are reared on a high-sugar diet. This observation is  
470 reminiscent of that reported for the PIP<sub>4</sub>K2B<sup>-/-</sup> mice that have a reduced adult body weight compared  
471 to controls and clear blood glucose faster following a sugar bolus than control animals (Lamia et al.,  
472 2004). Our observation that dPIP<sub>4</sub>K at the plasma-membrane controls sensitivity to insulin receptor  
473 activation suggests a molecular basis for the physiological phenotypes observed in *dPIP4K<sup>29</sup>* larvae and  
474 PIP<sub>4</sub>K2B<sup>-/-</sup> mice. These observations also raise the possibility that inhibition of PIP<sub>4</sub>K activity may offer  
475 a route to reducing insulin resistance in the context of Type II diabetes. Such a mechanism may explain  
476 the hyperactivation of the T-cell receptor responses in mice lacking PIP<sub>4</sub>K2C (Shim et al., 2016), since  
477 the activation of Class I PI<sub>3</sub>K is a key element of T-cell receptor signal transduction. More generally,  
478 PIP<sub>4</sub>K activity likely offers a novel element of regulation for Class I PI<sub>3</sub>K activity in the context of  
479 receptor tyrosine kinase signalling.

480

481

482

483

484

485

## 486 Materials and Methods

### 487 *Drosophila* strains and rearing –

488 Unless indicated, flies were grown on standard fly medium containing corn meal, yeast extract, sucrose,  
489 glucose, agar and antifungal agents. For all experiments, crosses were setup at 25°C in vials/bottles under  
490 non-crowded conditions.

491 Fly medium composition:

| Ingredients                       | 0.1 M sucrose | 1 M sucrose |
|-----------------------------------|---------------|-------------|
| For 1 Litre                       |               |             |
| Corn flour                        | 80 g          | 80 g        |
| D-Glucose                         | 20 g          | 20 g        |
| Sugar                             | 40 g          | 342 g       |
| Agar                              | 8 g(4g)       | 8 g         |
| Yeast powder                      | 15 g          | 15 g        |
| Propionic acid                    | 4 ml          | 4 ml        |
| TEGO(Methyl parahydroxy benzoate) | 0.7 g         | 0.7 g       |
| Orthophosphoric acid              | 0.6 ml        | 0.6 ml      |

492

493 The following stocks were used in the study: wildtype strain Red Oregon R (ROR), AB1-Gal4  
494 (Bloomington # 1824), *UAS-dInR* (Bloomington # 8262), *UAS-Rheb<sup>RNAi</sup>* (Bloomington TRiP # 33966),  
495 *UAS-Rheb* (Bloomington # 9688), *UAS-TSC<sup>RNAi</sup>* (Bloomington TRiP # 52931), P{tGPH}4 (Bloomington  
496 # 8164), *UAS-dPIP4K<sup>RNAi</sup>* (Bloomington TRiP # 65891). *UAS-dPIP4K::eGFP* and *dPIP4K<sup>29</sup>* were  
497 generated in the lab and described in (Gupta et al., 2013). For PIP<sub>3</sub> measurements in the *dPIP4K<sup>29</sup>* rescue  
498 experiment (Fig. 4F) using GFP-PH-GRP1 probe, we cloned dPIP4K cDNA (BDGP clone# LD10864)  
499 into pUAST-attB between *EcoRI* and *XhoI* sites without the GFP tag. The generation of flies expressing  
500 dPIP4K::mCherry-CAAX is described in Kumari K et.al, 2017. For targeting dPIP4K to the  
501 endomembranes, the sequence QGSMGLPCVVM (Sato.M et. al., 2006) replaced the CAAX motif in the  
502 dPIP4K::mCherry-CAAX construct. To generate Lysosomal-dPIP4K::eGFP, the 39 amino-acid  
503 sequence from p18/LAMTOR (Menon S et.al., 2014) was used as a signal sequence. The signal sequence  
504 was commercially synthesized with a C-terminal flag tag and introduced upstream of dPIP4K::eGFP.

505 The entire fusion construct was cloned into pUAST-attB by GIBSON assembly using *NotI* and *XbaI*  
506 sites. All transgenic lines were generated using insertions that were performed using site-specific  
507 recombination. The level of GFP fluorescence from lysosomal-dPIP<sub>4</sub>K::eGFP was observed to be very  
508 low in the salivary glands and did not interfere with our analysis PIP<sub>3</sub> measurements using the GFP-PH-  
509 GRP1 probe in Fig. 6F.

510

#### 511 Cell Culture, dsRNA treatment and Insulin stimulation assays -

512 CHO cell line stably expressing insulin receptor (isoform A) was a kind gift from Dr Nicholas Webster,  
513 UCSD. These were maintained at standard conditions in HF12 culture medium supplemented with 10%  
514 Fetal bovine serum and under G<sub>418</sub> selection (400 µg/ml). Transfections were done 48 hrs. before the  
515 assay using FuGene, Promega Inc. as per manufacturer's protocols when the cultures were 50%  
516 confluent. For insulin stimulation assays, cells were starved overnight in HF12 medium without serum.  
517 Thereafter, the cells were de-adhered, collected into eppendorf tubes and stimulated with 1 µM insulin  
518 for indicated times. Post stimulation, cells were spun down and immediately lysed. For dsRNA  
519 treatments, 0.5 X 10<sup>6</sup> cells were seeded into a 24-well plate. Once observed to be settled, cells were  
520 incubated with incomplete medium containing 1.875 µg of dsRNA. After 1 hour, an equal amount of  
521 complete medium was added to each well. The same procedure was repeated on each well 48 hours after  
522 initial transfection after removal of the spent medium from each well. Cells were harvested by  
523 trypsinization after a total of 96 hours of dsRNA treatment. For mass spectrometric estimation of PIP<sub>3</sub>,  
524 S<sub>2</sub>R+ cells were pelleted down and stimulated with 1 µM insulin for 10 min. The reaction was stopped  
525 by the addition of ice-cold initial organic mix (described later in the section) and used for lipid  
526 extraction.

527

#### 528 Larval growth Curve Analysis -

529 Adult flies were made to lay eggs within a span of 4-6 hrs on normal food. After 24 hrs, newly hatched  
530 first instar larvae were collected and transferred in batches of about 15-25 larvae per into vials containing  
531 either 0.1/1M Sucrose in the fly media with other components unaltered. The vials were then observed  
532 to count the number of pupae.

533

534

535

536 **Hemolymph Trehalose Measurements –**

537 The measurements were done exactly as described in (Musselman et al., 2011). In brief, hemolymph was  
538 pooled from five to eight larvae to obtain 1 µl for assay. The reagents used porcine trehalase (SIGMA,  
539 T8778) and GO kit (SIGMA, GAGO20)

540

541 **Cell size analysis in salivary glands -**

542 Salivary glands were dissected from wandering third instar larvae and fixed in 4% paraformaldehyde for  
543 30 min at 4°C. Post fixation, glands were washed thrice with 1X PBS and incubated in BODIPY-FL-488  
544 for 3 hours at room temperature. The glands were washed thrice in 1X PBS following which nuclei were  
545 labelled (using either DAPI or TOTO3) for 10 mins at room temperature and washed with 1X PBS again.  
546 The glands were then mounted in 70% glycerol and imaged within a day of mounting. Imaging was done  
547 on Olympus FV1000 Confocal LSM using a 20x objective. The images were then stitched into a 3D  
548 projection using an ImageJ plugin. These reconstituted 3D z-stacks were then analyzed for nuclei  
549 numbers (correlate for cell number) and volume of the whole gland using Volocity Software (version  
550 5.5.1, Perkin Elmer Inc.). The average cell size was calculated as the ratio of the average volume of the  
551 gland to the number of nuclei.

552

553 ***Ex vivo* insulin stimulation and PIP<sub>3</sub> measurements in salivary glands and fat body -**

554 For experiments with salivary glands, wandering third instar larvae were dissected one larva at a time  
555 and glands were immediately dropped into a well of a 96-well plate containing either only PBS or PBS +  
556 10 µM Insulin (75 µl) and incubated for 10 min at RT. Following this, 25 µl of 16% PFA was added into  
557 the same well to yield a final conc. of 4% PFA. The glands were fixed in this solution for 18 min at room  
558 temperature and then transferred sequentially to wells containing PBS every 10 min for 3 washes. Finally,  
559 glands were mounted in 80% glycerol in PBS containing antifade (0.4% propyl-gallate). For experiments  
560 with fat body lobes, late third instar feeding larvae were starved by placing them on a filter paper soaked  
561 in 1X PBS for 2 hrs. Thereafter, the incubation, fixation and mounting steps were done exactly as  
562 described for salivary glands. Imaging was done on LSM 780 inverted confocal microscope with a  
563 20X/0.8 NA Plan Achromat objective. For quantification, confocal slices were manually curated to  
564 generate maximum z-projections of middle few planes of cells. Thereafter, line profiles were drawn  
565 across clearly identifiable plasma membrane regions and their adjacent cytosolic regions and ratios of  
566 mean intensities for these line profiles were calculated for each cell. For salivary glands, about 10-15 cells

567 from multiple glands were analyzed and used to generate statistics. For fat body, about 50 cells each from  
568 multiple animals were used for analysis.

569

570 For live imaging, salivary glands from wandering third instar larvae were dissected (glands from one  
571 larva imaged in one imaging run) and placed inside a drop of imaging buffer (1X PBS containing 2mg/ml  
572 glucose) on a coverglass. The buffer was carefully and slowly soaked out with a paper tissue to let the  
573 glands settle and adhere to the surface. Thereafter, the glands were immediately rehydrated with 25  $\mu$ l  
574 of imaging buffer. The imaging was done on Olympus FV3000 LSM confocal system using a 10X  
575 objective. A total of 80 frames of a single plane were acquired, with 10s intervals. While imaging, 25  $\mu$ l  
576 of 200nM (2X) bovine insulin was used to stimulate the glands. After the steady state was achieved, 50  $\mu$ l  
577 of 800nM (2X) of wortmannin was added on top to inhibit PI3K activity.

578

579 **PIP<sub>3</sub> measurement by LC-MS/MS –**

580 The method was adopted and modified as required from (Clark et al., 2011).

581 **Lipid extraction –**

582 5 larvae were dissected in 1X PBS and transferred immediately into 37.5  $\mu$ l of 1X PBS in a 2 ml  
583 Eppendorf. For insulin stimulation, to this, 37.5  $\mu$ l of 100  $\mu$ M Insulin (final concentration – 50  $\mu$ M) was  
584 added and the tube was incubated on a mix mate shaker for 10 min at 500 rpm. At the end of incubation  
585 time, 750  $\mu$ l of ice-cold 2:1 MeOH:CHCl<sub>3</sub> organic mix was added to stop the reaction. Part of this  
586 solution was decanted and the rest of the mix containing larval tissues was transferred into a  
587 homogenization tube. Larval tissues were homogenized in 4 cycles of 10 secs with 30 sec intervals at  
588 6000 rpm in a homogenizer (Precellys, Bertin Technologies). The tubes were kept on ice at all intervals.  
589 The entire homogenate was then transferred to a fresh eppendorf and the homogenization tube was then  
590 washed with the decanted mix kept aside earlier. 120  $\mu$ l of water was added to the homogenate collected  
591 in eppendorf, followed by addition of 5 ng of 17:0, 20:4 PIP<sub>3</sub> internal standard (ISD). The mixture was  
592 vortexed and 725  $\mu$ l of chloroform was added to it. After vortexing again for 2 min at around 1000-1500  
593 rpm, the phases were separated by centrifugation for 3 min at 1500g. 1ml of lower organic phase was  
594 removed and stored in a fresh tube. To the remaining aqueous upper phase, again 725  $\mu$ l of chloroform  
595 was added. The mixture was vortexed and spun down to separate the phases. Again, 1 ml of the organic  
596 phase was collected and pooled with the previous collection (total of 2ml). This organic phase was used  
597 for measuring total organic phosphate. To the aqueous phase, 500  $\mu$ l of the initial organic mix was added

598 followed by 170 µl of 2.4M HCl and 500 µl of CHCl<sub>3</sub>. This mixture was vortexed for 5 min at 1000-1500  
599 rpm and allowed to stand at room temperature for 5 minutes. The phases were separated by  
600 centrifugation (1500g, 3 min). The lower organic phase was collected into a fresh tube by piercing  
601 through the protein band sitting at the interface. To this, 708 µl of lower phase wash solution was added,  
602 the mixture was vortexed and spun down (1500g, 3 min). The resultant lower organic phase was  
603 completely taken out carefully into an Eppendorf tube and used for derivatization reaction.

604

#### 605 **Extraction solvent mixtures:**

606 Initial organic mix: MeOH/Chloroform in the ratio of 484/242 ml, Lower Phase Wash Solution:  
607 Methanol/1 M hydrochloric acid/ chloroform in a ratio of 235/245/15 ml. All ratios are expressed as  
608 vol/vol/vol.

609

#### 610 **Derivatization of Lipids –**

611 To the organic phase of the sample, 50 µl of 2M TMS-Diazomethane was added (TO BE USED WITH  
612 ALL SAFETY PRECAUTIONS!). The reaction was allowed to proceed at room temperature for 10 min  
613 at 600 rpm. After 10 min, 10 µl of Glacial acetic acid was added to quench the reaction, vortexed briefly  
614 and spun down. 700 µl of post derivatization wash solvent was then added to the sample, vortexed (2  
615 min, 1000-1500 rpm) and spun down. The upper aqueous phase was discarded and the wash step was  
616 repeated. To the final organic phase, 100 µl of 9:1 MeOH:H<sub>2</sub>O mix was added and the sample was dried  
617 down to about 10-15 µl in a speedvac under vacuum.

618

#### 619 **Chromatographic separation and Mass spectrometric detection –**

620 The larval lipid extracts were re-suspended in 170 µl LC-MS grade methanol and 30 µl LC-MS grade  
621 water. Samples were injected as duplicate runs of 3.5 µl. Chromatographic separation was performed on  
622 an Acquity UPLC BEH<sub>300</sub> C<sub>4</sub> column (100 x 1.0 mm; 1.7 µm particle size) purchased from Waters  
623 Corporation, USA on a Waters Aquity UPLC system and detected using an ABSCIEX 6500 QTRAP  
624 mass spectrometer. The flow rate was 100 µL/min. Gradients were run starting from 55% Buffer A  
625 (Water + 0.1% Formic Acid)- 45% Buffer B (Acetonitrile + 0.1% Formic acid) to 42% B from 0-5 min;  
626 thereafter 45% B to 100% B from 5-10 min; 100% B was held from 10-15 min; brought down from 100%  
627 B to 45% B between 15-16 min and held there till 20th min to re-equilibrate the column. On the mass  
628 spectrometer, in pilot standardization experiments, we first employed Neutral Loss Scans on biological

629 samples to look for parent ions that would lose neutral fragments of 598 a.m.u indicative of PIP<sub>3</sub> lipid  
 630 species (as described in (Clark et al., 2011)). Thereafter, these PIP<sub>3</sub> species were quantified in biological  
 631 samples using the selective Multiple Reaction Monitoring (MRM) method in the positive mode. Only  
 632 those MRM transitions that showed an increase upon insulin stimulation of biological samples were  
 633 used for the final experiments (depicted in figure S3B). The MRM transitions for the different PIP<sub>3</sub>  
 634 species quantified are listed out in the table below. Area of all the peaks was calculated on Sciex  
 635 MultiQuant software. The area of the internal standard peak was used to normalize for lipid recovery  
 636 during extraction. The normalized for each of the species was then divided by the amount of organic  
 637 phosphate measured in each of the biological samples. The other mass spectrometer parameters are as  
 638 follows: ESI voltage: +4500V; Dwell time: 40 ms ; DP (De-clustering Potential): 35.0 V; EP: (Entrance  
 639 Potential): 10.1 V, CE (Collision Energy): 47.0 V; CXP (Collision cell Exit Potential): 11.6 V, Source  
 640 Temperature : 450 C, Ion Spray Voltage – 4000 V, Curtain Gas : 35.0, GS1: 15, GS2: 16. The area under  
 641 the peaks was extracted using MultiQuant v1.1 software (ABSCIEX). Numerical analysis was done in  
 642 Microsoft Excel.

|                 | Sample                   |            |              |                          |            |              |
|-----------------|--------------------------|------------|--------------|--------------------------|------------|--------------|
|                 | Drosophila Larvae        |            |              | S2R+ cells               |            |              |
|                 | PIP <sub>3</sub> species | Parent Ion | Daughter Ion | PIP <sub>3</sub> species | Parent Ion | Daughter Ion |
| MRM Transitions | 32_1                     | 1145.5     | 547.5        | 30_1                     | 1119.5     | 521.5        |
|                 | 32_2                     | 1177.5     | 579.5        | 32_0                     | 1149.5     | 551.5        |
|                 | 34_1                     | 1175.5     | 577.5        | 32_1                     | 1147.5     | 549.5        |
|                 | 34_2                     | 1173.5     | 575.5        | 32_2                     | 1145.5     | 547.5        |
|                 | 34_3                     | 1171.5     | 573.5        | 34_0                     | 1177.5     | 579.5        |
|                 | 36_1                     | 1203.5     | 605.5        | 34_1                     | 1175.5     | 577.5        |
|                 | 36_2                     | 1201.5     | 603.5        | 34_2                     | 1173.5     | 575.5        |
|                 | 36_3                     | 1199.5     | 601.5        | 34_3                     | 1171.5     | 573.5        |
|                 | 36_4                     | 1197.5     | 599.5        | 34_4                     | 1169.5     | 571.5        |
|                 |                          |            |              | 34_5                     | 1167.5     | 569.5        |
|                 |                          |            |              | 36_2                     | 1201.5     | 603.5        |
|                 |                          |            |              | 36_3                     | 1199.5     | 601.5        |
|                 |                          |            |              | 36_4                     | 1197.5     | 599.5        |
|                 |                          |            |              | 36_5                     | 1195.5     | 597.5        |
|                 |                          |            |              | 38_3                     | 1227.5     | 629.5        |
|                 |                          |            |              | 38_4                     | 1225.5     | 627.5        |
|                 |                          |            |              | 38_5                     | 1223.5     | 625.5        |
|                 |                          |            | 37_4 ISD     | 1211.5                   | 613.5      |              |

643

644



645 **Total Organic Phosphate measurement–**

646 1 ml of the organic phase from each sample was taken into phosphate-free tubes and dried completely  
647 at 90°C. The remaining steps were performed as described in *Thakur et.al., 2016*.

648

649 **Preparation of S2R+ cell lysate for *in vitro* PI5P 4- kinase assay**

650 The S2R+ cells were pelleted at 1000g for 10 min and washed with ice-cold PBS Twice. Cells were  
651 thereafter homogenized in lysis buffer containing 50mM Tris-Cl, pH – 7.5, 1mM EDTA, 1mM EGTA,  
652 1% Triton-X-100, 50mM NaF, 0.27 M Sucrose, 0.1% β- Mercaptoethanol and freshly added protease and  
653 phosphatase inhibitors (Roche). The lysate was then centrifuged at 1000g for 15 min at 4 °C. Protein  
654 estimation was performed using the Bradford reagent according to the manufacturer’s instructions.

655

656 **PI5P4-kinase Assay**

657 Vacuum-dried substrate lipid (6 μM PI5P) and 20 μM of phosphatidylserine were resuspended in 10  
658 mM Tris pH 7.4 and micelles were formed by sonication for 2 min in a bath-sonicator. 50 μl of 2×  
659 PIPkinase reaction buffer (100 mM Tris pH 7.4, 20 mM MgCl<sub>2</sub>, 140 mM KCl, and 2 mM EGTA)  
660 containing 20 μM ATP, 5 μCi [γ-<sup>32</sup>P] ATP and cell lysates containing ~10 μg total protein was added to  
661 the micelles. The reaction mixture was incubated at 30 °C for 16 h. Lipids were extracted and resolved  
662 by one dimensional TLC (45:35:8:2 chloroform: methanol: water: 25% ammonia). The resolved lipids  
663 were imaged using phosphorImager.

664

665 **Western Blotting –**

666 For larval western blots, lysates were prepared by homogenizing 3 wandering third instar larvae or 5  
667 pairs of salivary glands from third instar larvae. In the case of CHO-IR cells, pelleted cells were lysed by  
668 repeated pipetting in lysis buffer (same as described above). Thereafter, the samples were heated at 95°C  
669 with Laemli loading buffer for 5 min and loaded onto an SDS- Polyacrylamide gel. The proteins were  
670 subsequently transferred onto a nitrocellulose membrane and incubated with indicated antibodies  
671 overnight at 4°C (for actin/tubulin incubation was done at room temperature for 3 hrs.). Primary  
672 antibody concentrations used were – anti- α-actin (SIGMA A5060) 1:1000; anti- dPIP4K 1:1000, anti –  
673 GAPDH (Novus Biologicals, #IM-5143A), anti-PIP4KB (Cell Signaling, #9694), anti – pAKTT308 (Cell  
674 Signaling, #9275), anti-AKT (Cell Signaling, # 9272). The blots were then washed thrice with Tris Buffer  
675 Saline containing 0.1% Tween-20 (0.1% TBS-T) and incubated with 1:10000 concentration of

676 appropriate HRP-conjugated secondary antibodies (Jackson Laboratories, Inc.) for 1.5 hrs. After three  
677 washes with 0.1% TBS-T, blots were developed using Clarity Western ECL substrate on a GE  
678 ImageQuant LAS 4000 system.

679

## 680 Acknowledgements

681 This work was supported by the National Centre for Biological Sciences, TIFR, Department of  
682 Biotechnology, Ministry of Science and Technology (India); and a Wellcome Trust-DBT India Alliance  
683 Senior Fellowship to PR. S.S is a recipient of the S.P Mukherji Fellowship from CSIR and S.M an ICMR  
684 Fellowship. We thank the NCBS *Drosophila*, Imaging and Lipidomics Facility for support.

685

## 686 References

687 Balakrishnan, S.S., Basu, U., and Raghu, P. (2015). Phosphoinositide signalling in *Drosophila*. *Biochim.*  
688 *Biophys. Acta - Mol. Cell Biol. Lipids* 1851, 770–784.

689 Barbieri, M., Bonafe, M., Franceschi, C., Paolisso, G., Bonafè, M., Franceschi, C., and Paolisso, G. (2003).  
690 Insulin/IGF-I-signaling pathway: an evolutionarily conserved mechanism of longevity from yeast to  
691 humans. *Am J Physiol Endocrinol Metab* 285, 1064–1071.

692 Bohni, R., Riesgo-Escovar, J., Oldham, S., Brogiolo, W., Stocker, H., Andruss, B.F., Beckingham, K., and  
693 Hafen, E. (1999). Autonomous control of cell and organ size by CHICO, a *Drosophila* homolog of  
694 vertebrate IRS1-4. *97*, 865–875.

695 Britton, J.S., Lockwood, W.K., Li, L., Cohen, S.M., and Edgar, B.A. (2002). *Drosophila*'s insulin/PI3-  
696 kinase pathway coordinates cellular metabolism with nutritional conditions. *2*, 239–249.

697 Brogiolo, W., Stocker, H., Ikeya, T., Rintelen, F., Fernandez, R., and Hafen, E. (2001). An evolutionarily  
698 conserved function of the *Drosophila* insulin receptor and insulin-like peptides in growth control. *Curr.*  
699 *Biol.* 11, 213–221.

700 Bulley, S.J., Droubi, A., Clarke, J.H., Anderson, K.E., Stephens, L.R., Hawkins, P.T., and Irvine, R.F.  
701 (2016). In B cells, phosphatidylinositol 5-phosphate 4-kinase- $\alpha$  synthesizes PI(4,5)P<sub>2</sub> to impact  
702 mTORC2 and Akt signaling. *Proc. Natl. Acad. Sci.* 113, 10571–10576.

703 Carricaburu, V., Lamia, K.A., Lo, E., Favereaux, L., Payrastra, B., Cantley, L.C., and Rameh, L.E. (2003).  
704 The phosphatidylinositol (PI)-5-phosphate 4-kinase type II enzyme controls insulin signaling by  
705 regulating PI-3,4,5-trisphosphate degradation. *Proc. Natl. Acad. Sci.* 100, 9867–9872.

706 Church, R.B., and Robertson, F.W. (1966). Biochemical analysis of genetic differences in the growth of  
707 *Drosophila*. *7*, 383–407.

708 Clark, J., Anderson, K.E., Juvin, V., Smith, T.S., Karpe, F., Wakelam, M.J.O., Stephens, L.R., and  
709 Hawkins, P.T. (2011). Quantification of PtdInsP<sub>3</sub> molecular species in cells and tissues by mass

- 710 spectrometry. *Nat. Methods* 8, 267–272.
- 711 Clarke, J.H., Wang, M., and Irvine, R.F. (2010). Localization, regulation and function of type II  
712 phosphatidylinositol 5-phosphate 4-kinases. *Adv. Enzyme Regul.* 50, 12–18.
- 713 Clément, S., Krause, U., Desmedt, F., Tanti, J.F., Behrends, J., Pesesse, X., Sasaki, T., Penninger, J.,  
714 Doherty, M., Malaisse, W., et al. (2001). The lipid phosphatase SHIP2 controls insulin sensitivity. *Nature*  
715 409, 92–97.
- 716 Durán, R. V, and Hall, M.N. (2012). Regulation of TOR by small GTPases. *EMBO Rep.* 13, 121–128.
- 717 Emerling, B.M., Hurov, J.B., Poulogiannis, G., Tsukazawa, K.S., Choo-Wing, R., Wulf, G.M., Bell, E.L.,  
718 Shim, H.S., Lamia, K.A., Rameh, L.E., et al. (2013). Depletion of a putatively druggable class of  
719 phosphatidylinositol kinases inhibits growth of p53-Null tumors. *Cell* 155, 844–857.
- 720 Engelman, J.A., Luo, J., and Cantley, L.C. (2006). The evolution of phosphatidylinositol 3-kinases as  
721 regulators of growth and metabolism. *7*, 606–619.
- 722 Georgiev, P., Okkenhaug, H., Drews, A., Wright, D., Lambert, S., Flick, M., Carta, V., Martel, C.,  
723 Oberwinkler, J., and Raghu, P. (2010). TRPM channels mediate zinc homeostasis and cellular growth  
724 during *Drosophila* larval development. *Cell Metab.* 12, 386–397.
- 725 Grainger, D.L., Tavelis, C., Ryan, A.J., and Hinchliffe, K. a (2011). Involvement of phosphatidylinositol  
726 5-phosphate in insulin-stimulated glucose uptake in the L6 myotube model of skeletal muscle. *Pflugers*  
727 *Arch.* 462, 723–732.
- 728 Gual, P., Le Marchand-Brustel, Y., and Tanti, J.-F. (2005). Positive and negative regulation of insulin  
729 signaling through IRS-1 phosphorylation. *Biochimie* 87, 99–109.
- 730 Gupta, A., Toscano, S., Trivedi, D., Jones, D.R., Mathre, S., Clarke, J.H., Divecha, N., and Raghu, P.  
731 (2013). Phosphatidylinositol 5-phosphate 4-kinase (PIP4K) regulates TOR signaling and cell growth  
732 during *Drosophila* development. *Proc Natl Acad Sci U S A* 110, 5963–5968.
- 733 Harrington, L.S., Findlay, G.M., Gray, A., Tolkacheva, T., Wigfield, S., Rebholz, H., Barnett, J., Leslie,  
734 N.R., Cheng, S., Shepherd, P.R., et al. (2004). The TSC1-2 tumor suppressor controls insulin-PI3K  
735 signaling via regulation of IRS proteins. *J. Cell Biol.* 166, 213–223.
- 736 Haruta, T., Uno, T., Kawahara, J., Takano, A., Egawa, K., Sharma, P.M., Olefsky, J.M., and Kobayashi,  
737 M. (2000). A Rapamycin-Sensitive Pathway Down-Regulates Insulin Signaling via Phosphorylation and  
738 Proteasomal Degradation of Insulin Receptor Substrate-1. *Mol. Endocrinol.* 783–794.
- 739 Hawkins, P.T., and Stephens, L.R. (2015). PI3K signalling in inflammation. *Biochim. Biophys. Acta -*  
740 *Mol. Cell Biol. Lipids* 1851, 882–897.
- 741 Hawkins, P.T., Anderson, K.E., Davidson, K., and Stephens, L.R. (2006). Signalling through Class I  
742 PI3Ks in mammalian cells. *Biochem. Soc. Trans.* 34, 647–662.
- 743 Jones, D.R., Foulger, R., Keune, W.-J., Bultsma, Y., and Divecha, N. (2013). PtdIns5P is an oxidative  
744 stress-induced second messenger that regulates PKB activation. *FASEB J.* 27, 1644–1656.
- 745 Kaisaki, P.J., Delépine, M., Woon, P.Y., Sebag-Montefiore, L., Wilder, S.P., Menzel, S., Vionnet, N.,

- 746 Marion, E., Riveline, J.-P., Charpentier, G., et al. (2004). Polymorphisms in type II SH2 domain-  
747 containing inositol 5-phosphatase (INPPL1, SHIP2) are associated with physiological abnormalities of  
748 the metabolic syndrome. *Diabetes* 53, 1900–1904.
- 749 Kockel, L., Kerr, K.S., Melnick, M., Brückner, K., Hebrok, M., and Perrimon, N. (2010). Dynamic switch  
750 of negative feedback regulation in *Drosophila* Akt-TOR signaling. *PLoS Genet.* 6, 1–17.
- 751 Kolay, S., Basu, U., and Raghu, P. (2016). Control of diverse subcellular processes by a single multi-  
752 functional lipid phosphatidylinositol 4,5-bisphosphate [PI(4,5)P<sub>2</sub>]. *Biochem. J.* 473, 1681–1692.
- 753 Lamia, K.A., Peroni, O.D., Kim, Y.B., Rameh, L.E., Kahn, B.B., and Cantley, L.C. (2004). Increased  
754 insulin sensitivity and reduced adiposity in phosphatidylinositol 5-phosphate 4-kinase beta-/- mice. *Mol*  
755 *Cell Biol* 24, 5080–5087.
- 756 Lizcano, J.M., Alrubaie, S., Kieloch, A., Deak, M., Leever, S.J., and Alessi, D.R. (2003). Insulin-induced  
757 *Drosophila* S6 kinase activation requires phosphoinositide 3-kinase and protein kinase B. *Biochem. J.*  
758 374, 297–306.
- 759 Luo, J., Manning, B.D., and Cantley, L.C. (2003). Targeting the PI<sub>3</sub>K-Akt pathway in human cancer:  
760 rationale and promise. *Cancer Cell* 4, 257–262.
- 761 Mackey, A.M., Sarkes, D.A., Bettencourt, I., Asara, J.M., and Rameh, L.E. (2014). PIP4k is a substrate for  
762 mTORC1 that maintains basal mTORC1 signaling during starvation. *Sci. Signal.* 7, ra104-ra104.
- 763 Malek, M., Kielkowska, A., Chessa, T., Anderson, K.E., Barneda, D., Pir, P., Nakanishi, H., Eguchi, S.,  
764 Koizumi, A., Sasaki, J., et al. (2017). PTEN Regulates PI(3,4)P<sub>2</sub> Signaling Downstream of Class I PI3K.  
765 *Mol. Cell* 68, 566–580.e10.
- 766 McConnachie, G., Pass, I., Walker, S.M., and Downes, C.P. (2003). Interfacial kinetic analysis of the  
767 tumour suppressor phosphatase, PTEN: evidence for activation by anionic phospholipids. *Biochem. J.*  
768 371, 947–955.
- 769 Musselman, L.P., Fink, J.L., Narzinski, K., Ramachandran, P.V., Hathiramani, S.S., Cagan, R.L., and  
770 Baranski, T.J. (2011). A high-sugar diet produces obesity and insulin resistance in wild-type *Drosophila*.  
771 *Dis. Model. Mech.* 4, 842–849.
- 772 Nässel, D.R., and Broeck, J. Vanden (2016). Insulin/IGF signaling in *Drosophila* and other insects:  
773 factors that regulate production, release and post-release action of the insulin-like peptides. *Cell. Mol.*  
774 *Life Sci.* 73, 271–290.
- 775 Paradis, S., Ailion, M., Toker, A., Thomas, J.H., and Ruvkun, G. (1999). A PDK1 homolog is necessary  
776 and sufficient to transduce AGE-1 PI<sub>3</sub> kinase signals that regulate diapause in *Caenorhabditis elegans*.  
777 *Genes Dev.* 13, 1438–1452.
- 778 Pasco, M.Y., and Léopold, P. (2012). High sugar-induced insulin resistance in *Drosophila* relies on the  
779 Lipocalin Neural Lazarillo. *PLoS One* 7, 1–8.
- 780 Pesesse, X., Moreau, C., Drayer, A.L., Woscholski, R., Parker, P., and Erneux, C. (1998). The SH2 domain  
781 containing inositol 5-phosphatase SHIP2 displays phosphatidylinositol 3,4,5-trisphosphate and inositol  
782 1,3,4,5-tetrakisphosphate 5-phosphatase activity. *FEBS Lett.* 437, 301–303.

- 783 Rameh, L.E., Tolias, K.F., Duckworth, B.C., and Cantley, L.C. (1997). A new pathway for synthesis of  
784 phosphatidylinositol-4,5-bisphosphate. *Nature* 390, 192–196.
- 785 Reilly, K.E.O., Rojo, F., She, Q., Solit, D., Mills, G.B., Lane, H., Hofmann, F., Hicklin, D.J., and Ludwig,  
786 D.L. (2011). mTOR Inhibition Induces Upstream Receptor Tyrosine Kinase Signaling and Activates Akt.  
787 *Cancer Res.* 66, 1500–1508.
- 788 Rintelen, F., Stocker, H., Thomas, G., and Hafen, E. (2001). PDK1 regulates growth through Akt and  
789 S6K in *Drosophila*. *Proc. Natl. Acad. Sci. U. S. A.* 98, 15020–15025.
- 790 Sarkes, D., and Rameh, L.E. (2010). A novel HPLC-based approach makes possible the spatial  
791 characterization of cellular PtdIns5P and other phosphoinositides. *Biochem. J.* 428, 375–384.
- 792 Shah, O.J., Wang, Z., and Hunter, T. (2004). Inappropriate Activation of the TSC/Rheb/mTOR/S6K  
793 Cassette Induces IRS1/2 Depletion, Insulin Resistance, and Cell Survival Deficiencies. *Curr. Biol.* 14,  
794 1650–1656.
- 795 Shim, H., Wu, C., Ramsamooj, S., Bosch, K.N., Chen, Z., Emerling, B.M., Yun, J., Liu, H., Choo-Wing,  
796 R., Yang, Z., et al. (2016). Deletion of the gene *Pip4k2c*, a novel phosphatidylinositol kinase, results in  
797 hyperactivation of the immune system. *Proc. Natl. Acad. Sci.* 113, 7596–7601.
- 798 Shingleton, A.W., Das, J., Vinicius, L., and Stern, D.L. (2005). The temporal requirements for insulin  
799 signaling during development in *Drosophila*. *PLoS Biol.* 3, e289.
- 800 Stephens, L.R., Hughes, K.T., and Irvine, R.F. (1991). Pathway of phosphatidylinositol(3,4,5)-  
801 trisphosphate synthesis in activated neutrophils. *Nature* 351, 33–39.
- 802 Tee, A.R., Manning, B.D., Roux, P.P., Cantley, L.C., and Blenis, J. (2003). Tuberous sclerosis complex  
803 gene products, Tuberin and Hamartin, control mTOR signaling by acting as a GTPase-activating protein  
804 complex toward Rheb. *Curr. Biol.* 13, 1259–1268.
- 805 Tremblay, F., Brûlé, S., Hee Um, S., Li, Y., Masuda, K., Roden, M., Sun, X.J., Krebs, M., Polakiewicz,  
806 R.D., Thomas, G., et al. (2007). Identification of IRS-1 Ser-1101 as a target of S6K1 in nutrient- and  
807 obesity-induced insulin resistance. *Proc. Natl. Acad. Sci. U. S. A.* 104, 14056–14061.
- 808 Tzatsos, A., and Kandror, K. V (2006). Nutrients suppress phosphatidylinositol 3-kinase/Akt signaling  
809 via raptor-dependent mTOR-mediated insulin receptor substrate 1 phosphorylation. *Mol. Cell. Biol.* 26,  
810 63–76.
- 811 Um, S.H., Frigerio, F., Watanabe, M., Picard, F., Joaquin, M., Sticker, M., Fumagalli, S., Allegrini, P.R.,  
812 Kozma, S.C., Auwerx, J., et al. (2004). Absence of S6K1 protects against age- and diet-induced obesity  
813 while enhancing insulin sensitivity. *Nature* 431, 200–205.
- 814 Wullschleger, S., Loewith, R., and Hall, M.N. (2006). TOR signaling in growth and metabolism. *Cell* 124,  
815 471–484.
- 816 Zhang, Y., Gao, X., Saucedo, L.J., Ru, B., Edgar, B. a, and Pan, D. (2003). Rheb is a direct target of the  
817 tuberous sclerosis tumour suppressor proteins. *Nat. Cell Biol.* 5, 578–581.
- 818

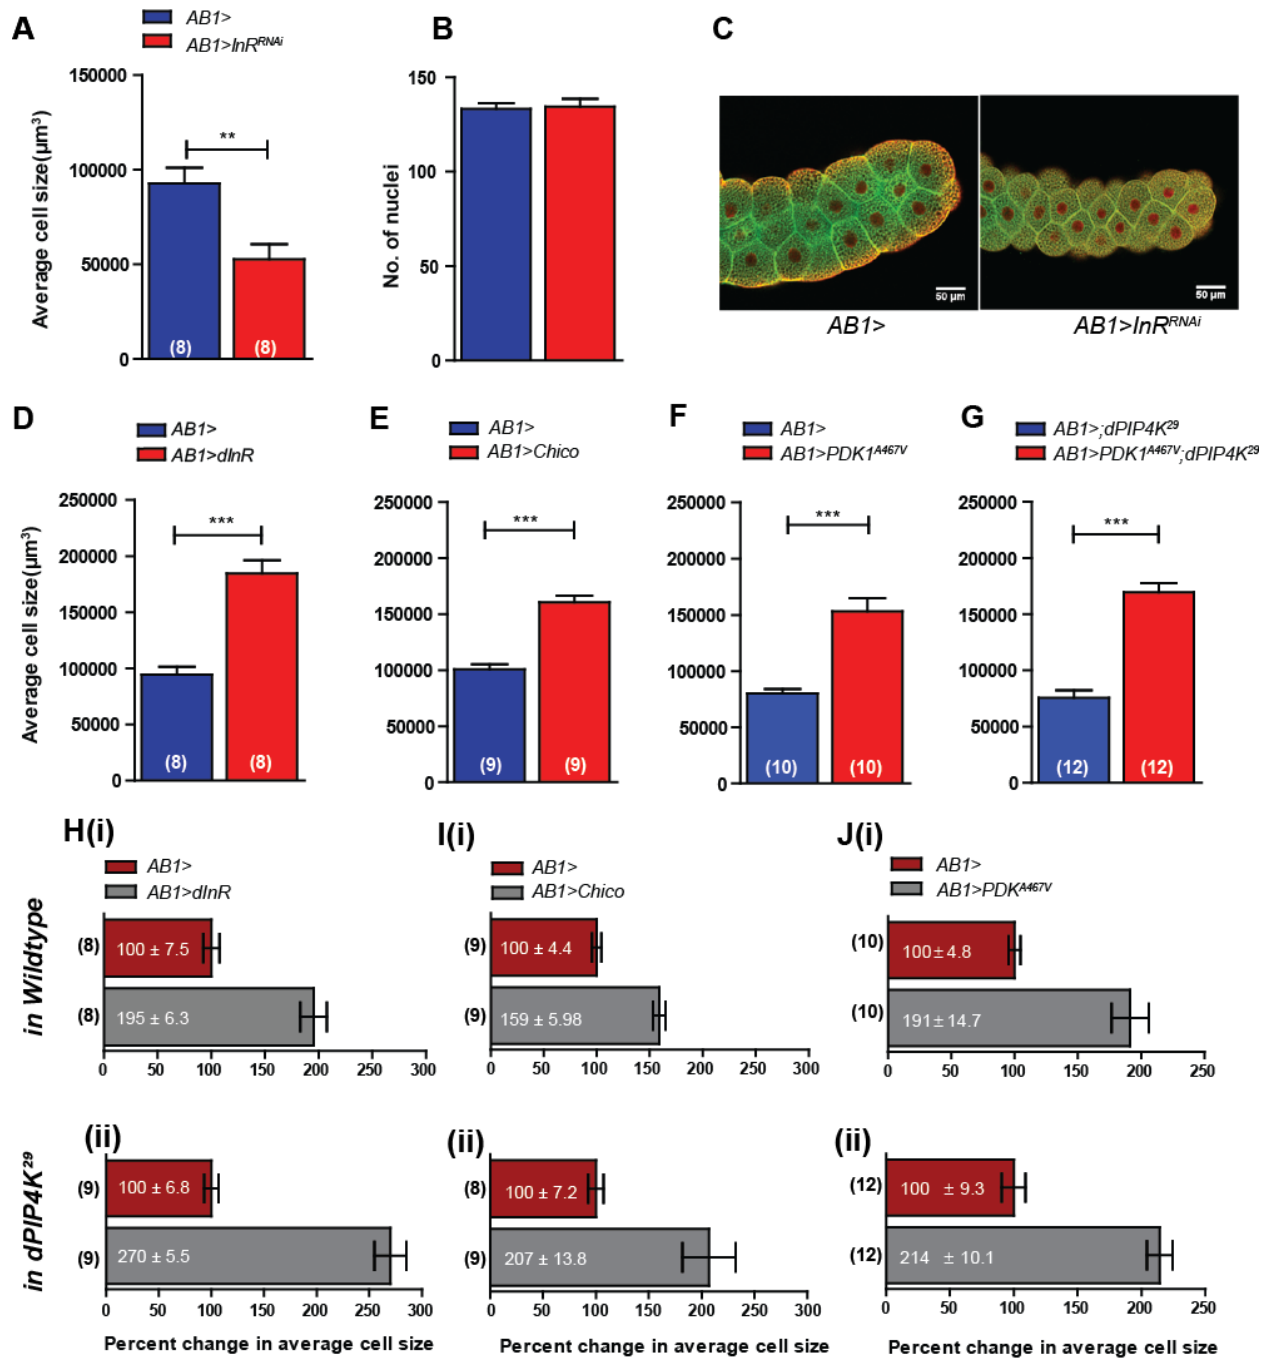

Sharma, et.al. Fig. 1

### Fig 1. dPIP4K epistatically interacts with insulin receptor signalling

Cell size measurements upon knockdown of Insulin receptor in salivary glands – A. Cell size measurements B. Quantification of the no. of nuclei C. Representative confocal sections of salivary glands of wandering third instar larvae labelled with green dye labelled BODIPY and TOTO<sub>3</sub> to mark the nuclei. Graphs represent mean  $\pm$  SEM. D. Overexpression of insulin receptor (InR) E. Overexpression of insulin receptor substrate-Chico F. Overexpression of PDK1<sup>A467V</sup> G. Overexpression of PDK1<sup>A467V</sup> in *dPIP4K<sup>29</sup>*. H-J'. Comparison of relative changes in cell size upon overexpression InR, chico and PDK1<sup>A467V</sup> in *wildtype* (H(i), I(i), J(i)) and *dPIP4K<sup>29</sup>* (H(ii), I(ii), J(ii)) salivary glands respectively. Scale: 50  $\mu$ m. Graphs represent mean  $\pm$  SE normalized to the mean of the ctrl. On each graph, numbers inside the parentheses indicate the no. of biological replicates used for the measurement. *Student's t-test* used for statistical analysis. \*\**p-value* <0.01, \*\*\**p-value* <0.001.



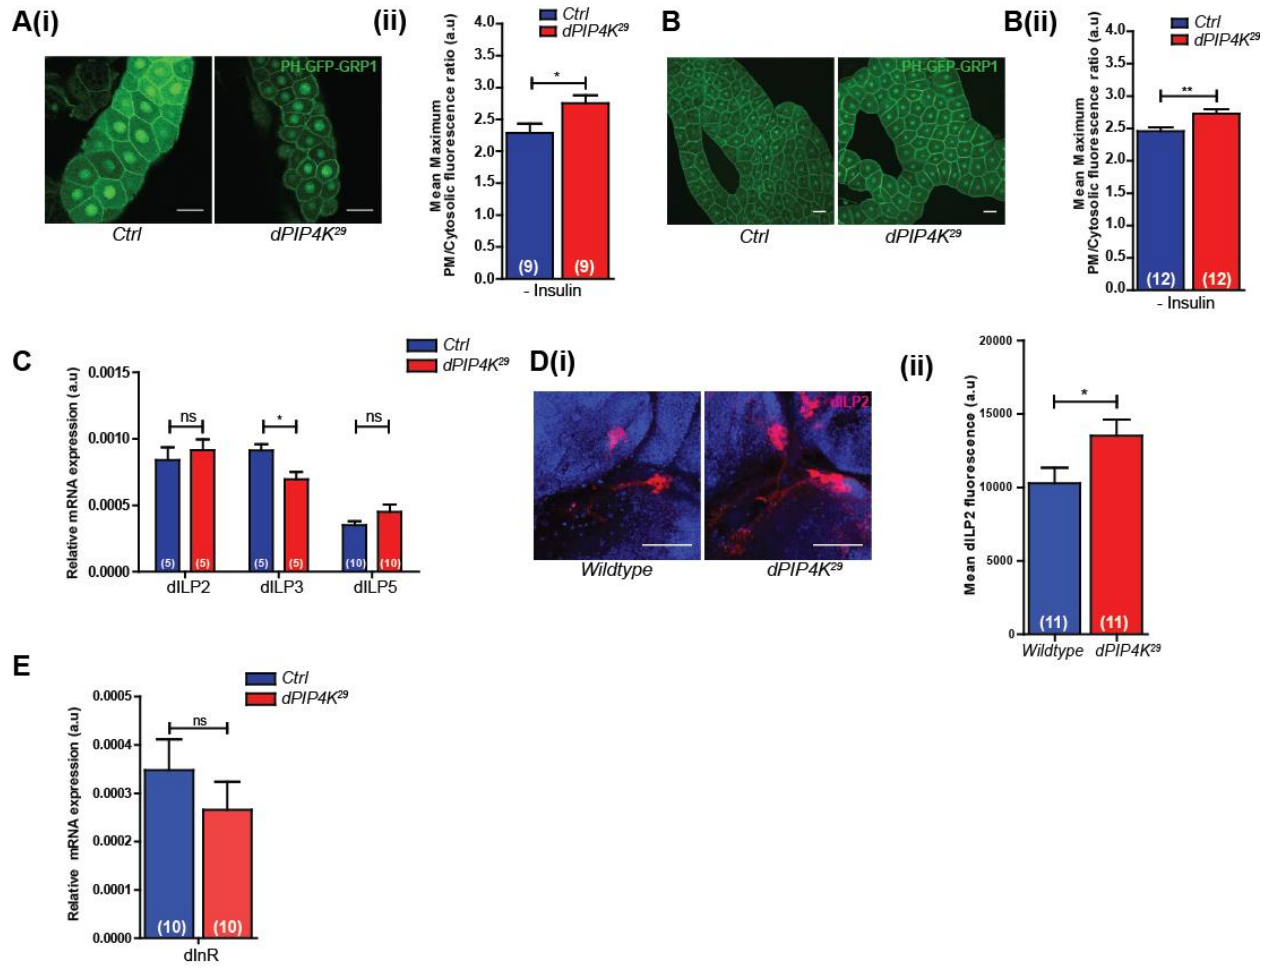

**Fig 2. Plasma membrane PIP<sub>3</sub> levels are elevated in *dPIP4K* mutant tissues without an increase in humoral dILP secretion**

A-B'. PIP<sub>3</sub> quantification – Images showing the intensity and localization of the PIP<sub>3</sub> binding probe (GFP-PH-GRP1) in larval tissues. The PIP<sub>3</sub> levels were quantified as the ratio of the probe fluorescence intensity on the plasma membrane to that in the cytosol. A(i). Representative confocal images showing the distribution of the probe in the salivary glands. A(ii). Quantification of PIP<sub>3</sub> levels between control and *dPIP4K*<sup>29</sup> salivary glands for experiment depicted in A(i). (Data represents mean of fluorescence intensity ratios calculated from a minimum of 10 cells from each salivary gland). B(i). Representative confocal images showing the distribution of the probe in the fat body and in B(ii) the quantification from these experiments. The ratio was calculated from about 50 cells from 12 fat body regions pooled from 5 animals for each genotype respectively. Wandering third instar larvae used for measurements. Scale: 50 μm for salivary gland images and 10 μm for fat body images C. qPCR measurements for mRNA levels of *dILP* 2, 3 and 5 from whole larvae. Transcript levels for each gene were normalized to the mRNA levels of *rp49* in the same sample. Graphs represent mean ± SEM D. qPCR measurements for *dInR*. Transcript levels for each gene were normalized to the mRNA levels of *rp49* in the same sample E(i). Confocal z-projections showing immunostaining for dILP2 in larval IPCs E(ii). Quantification showing mean ± SEM of dILP2 staining intensity in the third instar wandering larval brains. On each graph, numbers inside the parentheses indicate the no. of biological replicates used for the measurement. Scale: 50 μm. *Student's t-test* used for statistical analysis. \**p-value* < 0.05, \*\**p-value* < 0.01.

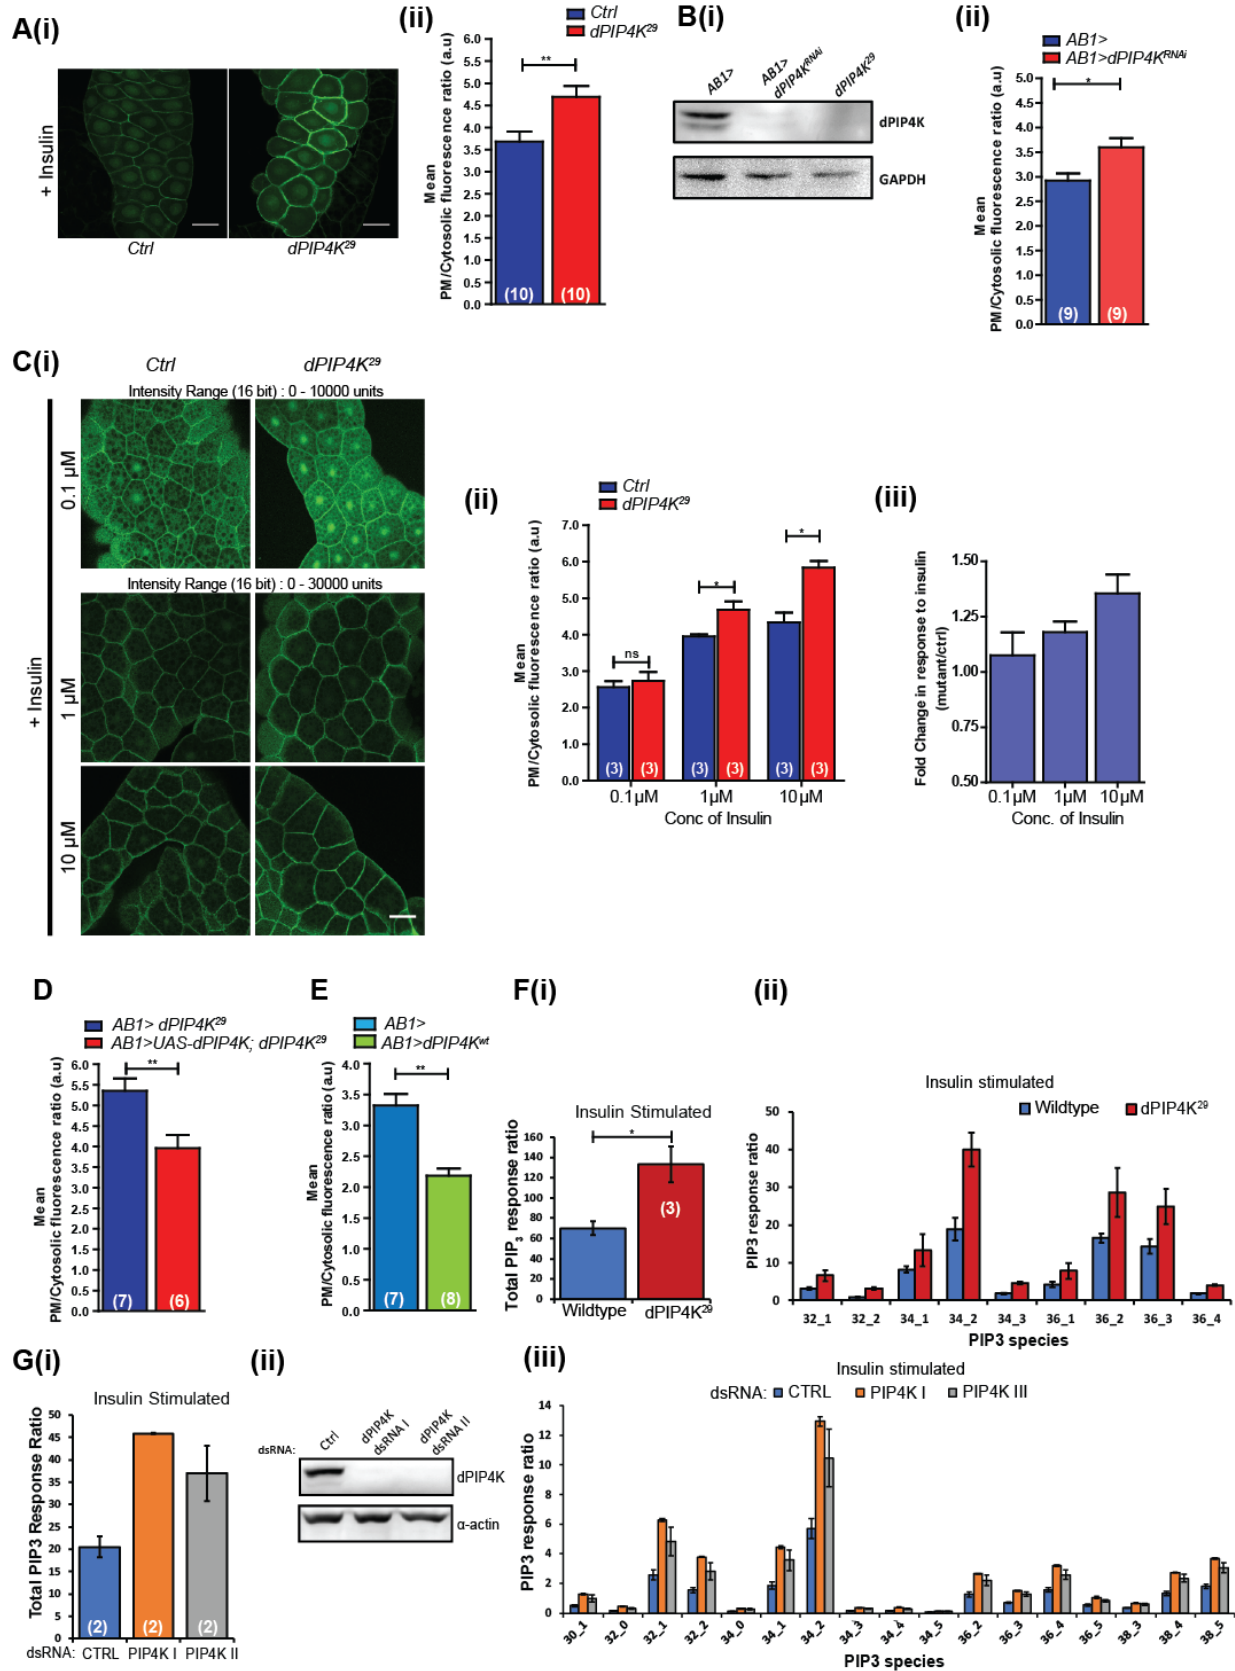

**Fig 3. Increased sensitivity of *Drosophila* larval cells to insulin stimulation upon loss of dPIP<sub>4</sub>K.**

A(i). Confocal z-projections showing levels and localization of the PIP<sub>3</sub> probe in control and *dPIP<sub>4</sub>K<sup>29</sup>* in salivary glands cells stimulated with 10 μM insulin for 10 min and in A(ii), quantification of PIP<sub>3</sub> levels between control and *dPIP<sub>4</sub>K<sup>29</sup>* salivary glands from the same set of experiments. The graph represents mean ± SEM. B(i). Confocal z-projections of fat body lobes expressing PIP<sub>3</sub> binding probe from control and *dPIP<sub>4</sub>K<sup>29</sup>* late third instar larvae stimulated with 0.1 μM, 1 μM and 10 μM insulin post 2 hr starvation. B(ii). Quantification of PIP<sub>3</sub> for experiments in fig. B (50 cells from at least 3 samples in the fat body for each genotype and treatment used for analysis). Scale: 50 μm. B(iii). Comparison of mean fold change (mutant w.r.t control) in response to insulin computed from data in B'. Error bars indicate SEM. C(i). Immunoblot (from wandering third instar stage) showing a reduction in levels of dPIP<sub>4</sub>K protein in salivary gland lysates upon knockdown of dPIP<sub>4</sub>K using *AB1GAL4*. Relative quantification of PIP<sub>3</sub> levels using the GFP-PH-GRP1 probe between, (C(ii)) control and *dPIP<sub>4</sub>K*-knockdown salivary glands (D) mutant and rescue salivary glands and (E) wildtype and salivary glands overexpressing dPIP<sub>4</sub>K. Graphs show mean PIP<sub>3</sub> levels ± SEM. Scale: 50 μM. F(i). Measurement of total PIP<sub>3</sub> levels in whole larval lipid extracts from wildtype and *dPIP<sub>4</sub>K<sup>29</sup>* using LCMS. F(ii). Levels of various larval PIP<sub>3</sub> species in wildtype and *dPIP<sub>4</sub>K<sup>29</sup>* whole larval lipid extracts. G(i). Measurement of total PIP<sub>3</sub> levels using LCMS in whole cell lipid extracts from S2R+ cells treated with indicated dsRNAs. F(ii). Levels of various larval PIP<sub>3</sub> species in whole cell lipid extracts from S2R+ cells. The graphs show mean PIP<sub>3</sub> levels (normalized to spiked internal standards and total lipid phosphates recovered). Error bars depict SEM. *Student's t-test* used for statistical analysis. \**p-value* < 0.05, \*\**p-value* < 0.01. On each graph, numbers inside the parentheses indicate the no. of biological replicates used for the measurement.

A

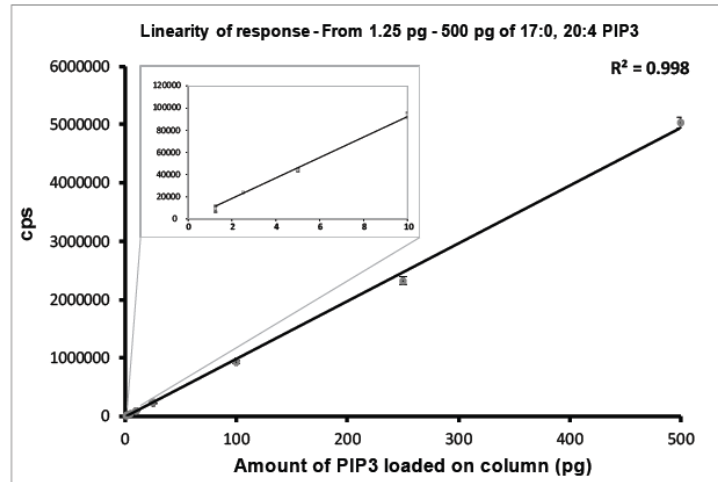

B

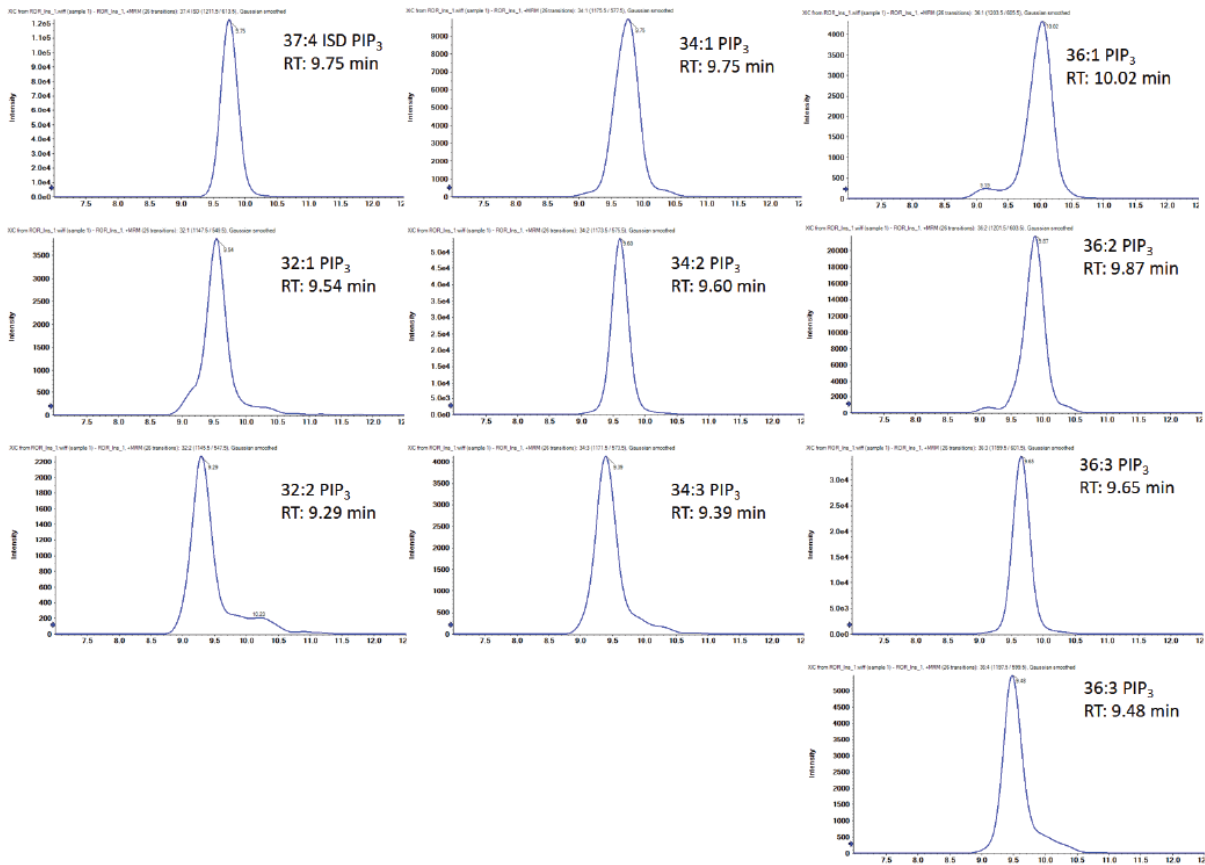

**Fig. 3, Supplement 1.**

(i) Linearity of mass spectrometer response for increasing amounts of PIP<sub>3</sub> standard (17:0, 20:4) injected. Each point on the curve indicates the mean  $\pm$  SD of three replicate injections. (ii) Chromatograms showing the elution profiles and retention times for various PIP<sub>3</sub> species detected from whole larval lipid extracts of wildtype larvae stimulated *ex-vivo* with 100  $\mu$ M insulin for 10 min. Note the changing retention times with increase in no. of double bonds and increase in length of acyl chains. Increase in double bonds for a fixed acyl chain length results in earlier elution. Increase in length of acyl chain delays elution.

**A**

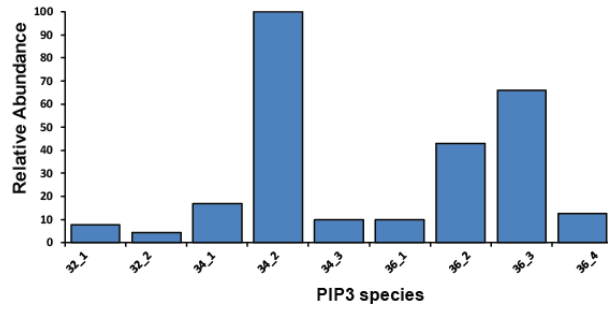

**B**

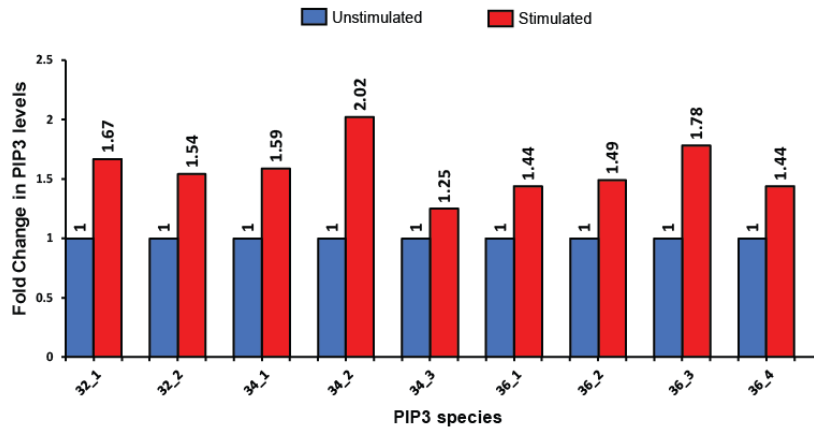

**C(i)**

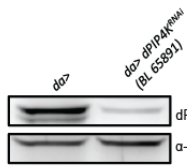

**(ii)**

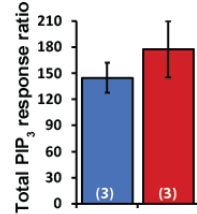

**(iii)**

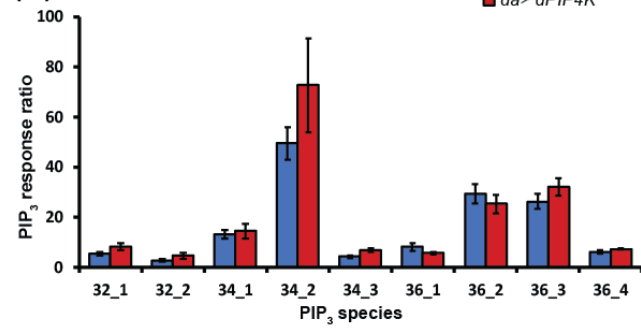

**D(i)**

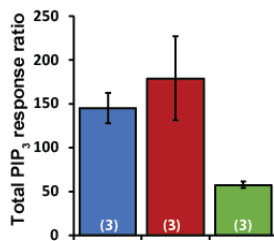

**(ii)**

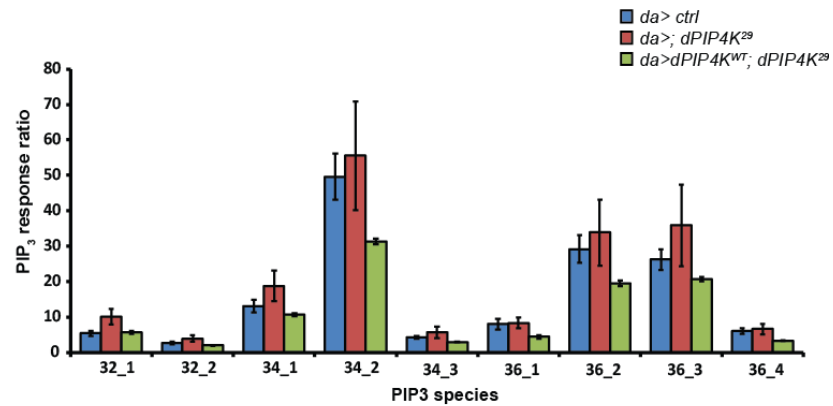



### Fig. 3, Supplement 2.

Quantitative measurement of total PIP<sub>3</sub> levels and individual PIP<sub>3</sub> species from whole larval lipid extracts of wandering third instar larvae. **A.** Relative abundance of various PIP<sub>3</sub> species in whole larval lipid extracts of wildtype larvae stimulated *ex-vivo* with 100 μM insulin for 10 min. **B.** A control experiment showing changes in the levels of various PIP<sub>3</sub> species upon insulin stimulation (100 μM, 10 min). **C(i).** Immunoblot from whole larval lysates showing reduction in levels of dPIP4K protein upon pan-larval RNAi for dPIP4K using *da*GAL4. **C(ii).** Total levels of PIP<sub>3</sub> in whole larval control and *dPIP4K<sup>RNAi</sup>* lipid extracts **C(iii).** Levels of various larval PIP<sub>3</sub> species in whole larval control and *dPIP4K<sup>RNAi</sup>* lipid extracts. **D(i)** and levels of individual species (**D(ii)**) in whole larval GAL4-control (*da*>), GAL4-control in *dPIP4K<sup>29</sup>* background (*da*>; *dPIP4K<sup>29</sup>*) and pan-larval rescue (*da*>*dPIP4K*; *dPIP4K<sup>29</sup>*) lipid extracts. The graphs show mean PIP<sub>3</sub> levels (normalized to spiked internal standards and total lipid phosphates recovered). Error bars depict SEM. On each panel, numbers inside the parentheses indicate the no. of biological replicates used for the measurement.

+ Insulin(10μM)

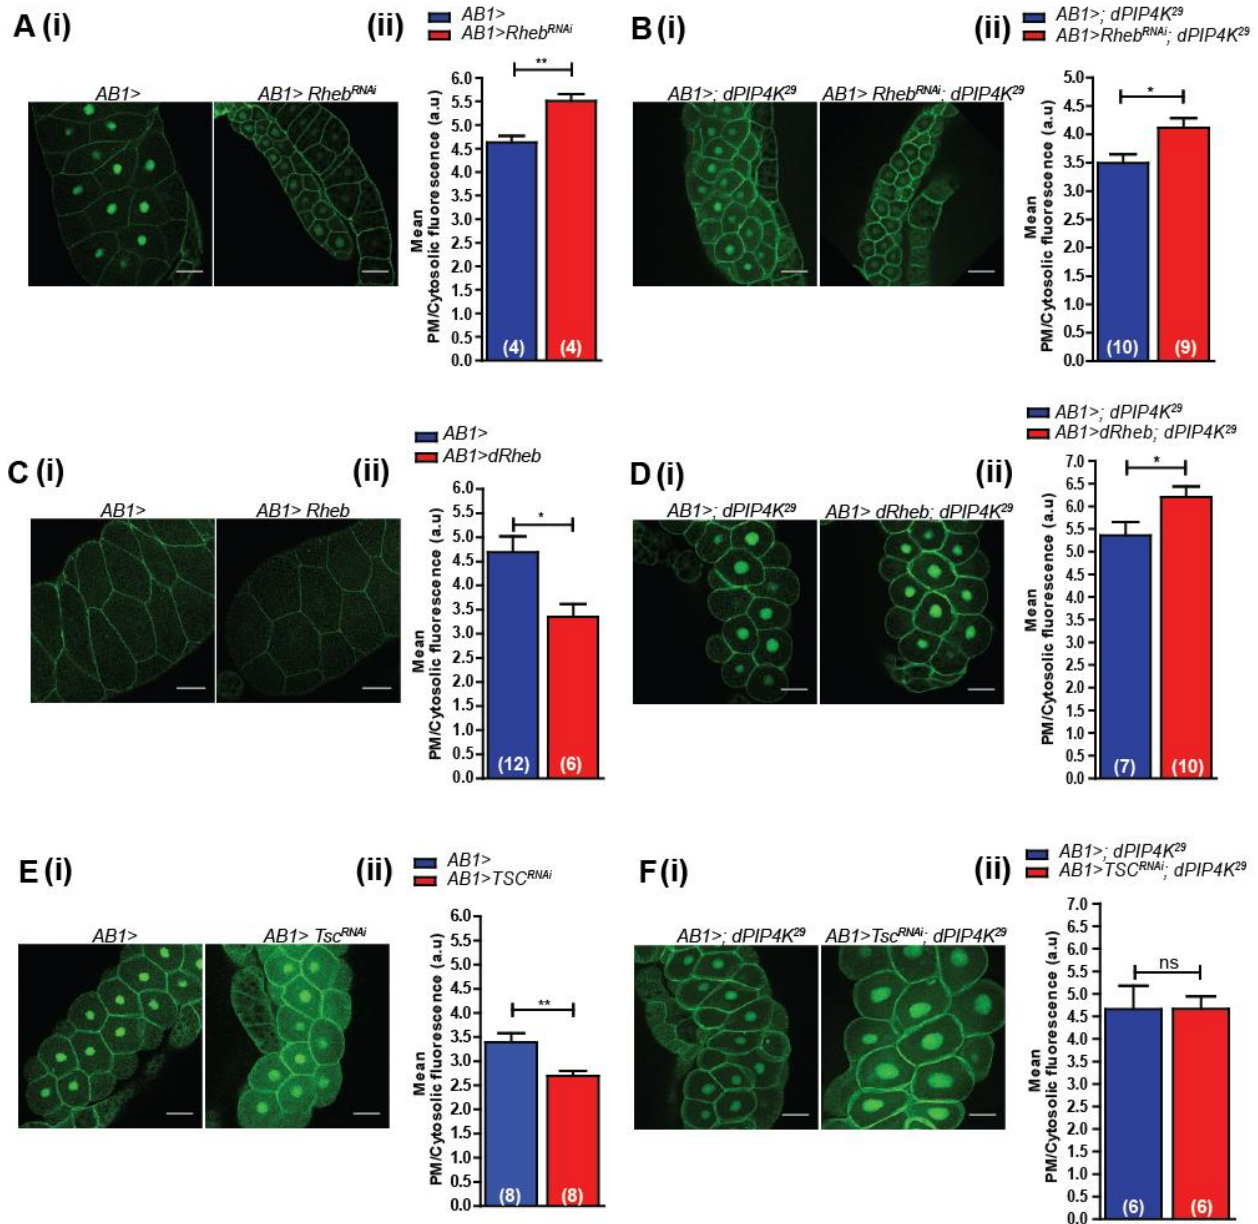

Sharma, et.al. Fig. 4

**Fig 4. Reduced TORC1-mediated negative feedback regulation of insulin signalling in *dPIP4K<sup>29</sup>* cells.**

PIP<sub>3</sub> quantification – Salivary gland images showing the distribution of the PIP<sub>3</sub> binding probe GFP-PH-GRP1 in cells. The distribution was quantified as the ratio of probe fluorescence on the plasma membrane to that in the cytosol. Data represent mean of fluorescence ratios (indicative of PIP<sub>3</sub> levels). In all these experiments, the genetic manipulation was restricted to the salivary glands using *AB1Gal4* A-C. In a wildtype background, Downregulation of TOR signalling by RNAi for *Rheb* [A (i and ii)]. Upregulation of TOR signalling through overexpression of *Rheb* [B (i and ii)], knockdown of *Tsc* [C (i and ii)] D-F. In a *dPIP4K<sup>29</sup>* background, Downregulation of TOR signalling by RNAi for *Rheb* [D (i and ii)] Upregulation of TOR signalling through overexpression of *Rheb* [E (i and ii)], knockdown of *Tsc* [F (i and ii)]. Graphs represent mean ± SEM. *Student's t-test* used for statistical analysis. \**p-value* < 0.05. \*\**p-value* < 0.01. On each graph, numbers inside the parentheses indicate the no. of biological replicates used for the measurement.

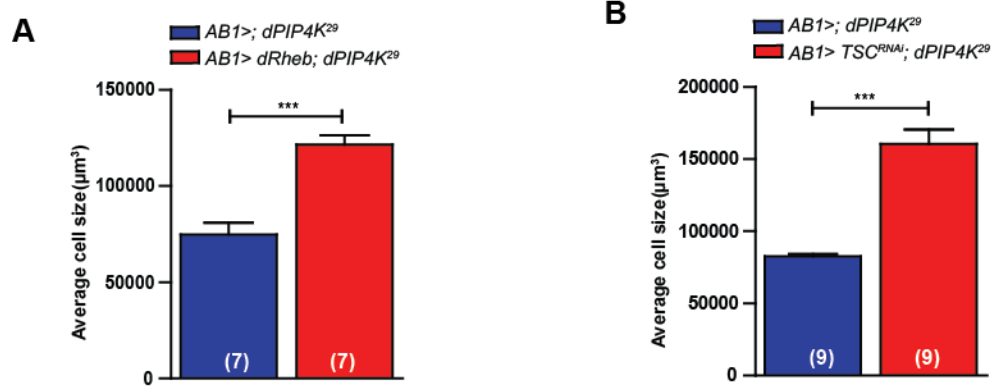

Sharma, et.al. Fig. 4, Supplement 1

Fig. 4, Supplement 1

Cell size measurements in salivary glands of *dPIP4K<sup>29</sup>* upon (A) overexpression of dRheb (B) Knockdown of TSC. Graphs represent mean  $\pm$  SEM. On each panel, numbers inside the parentheses indicate the no. of biological replicates used for the measurement.

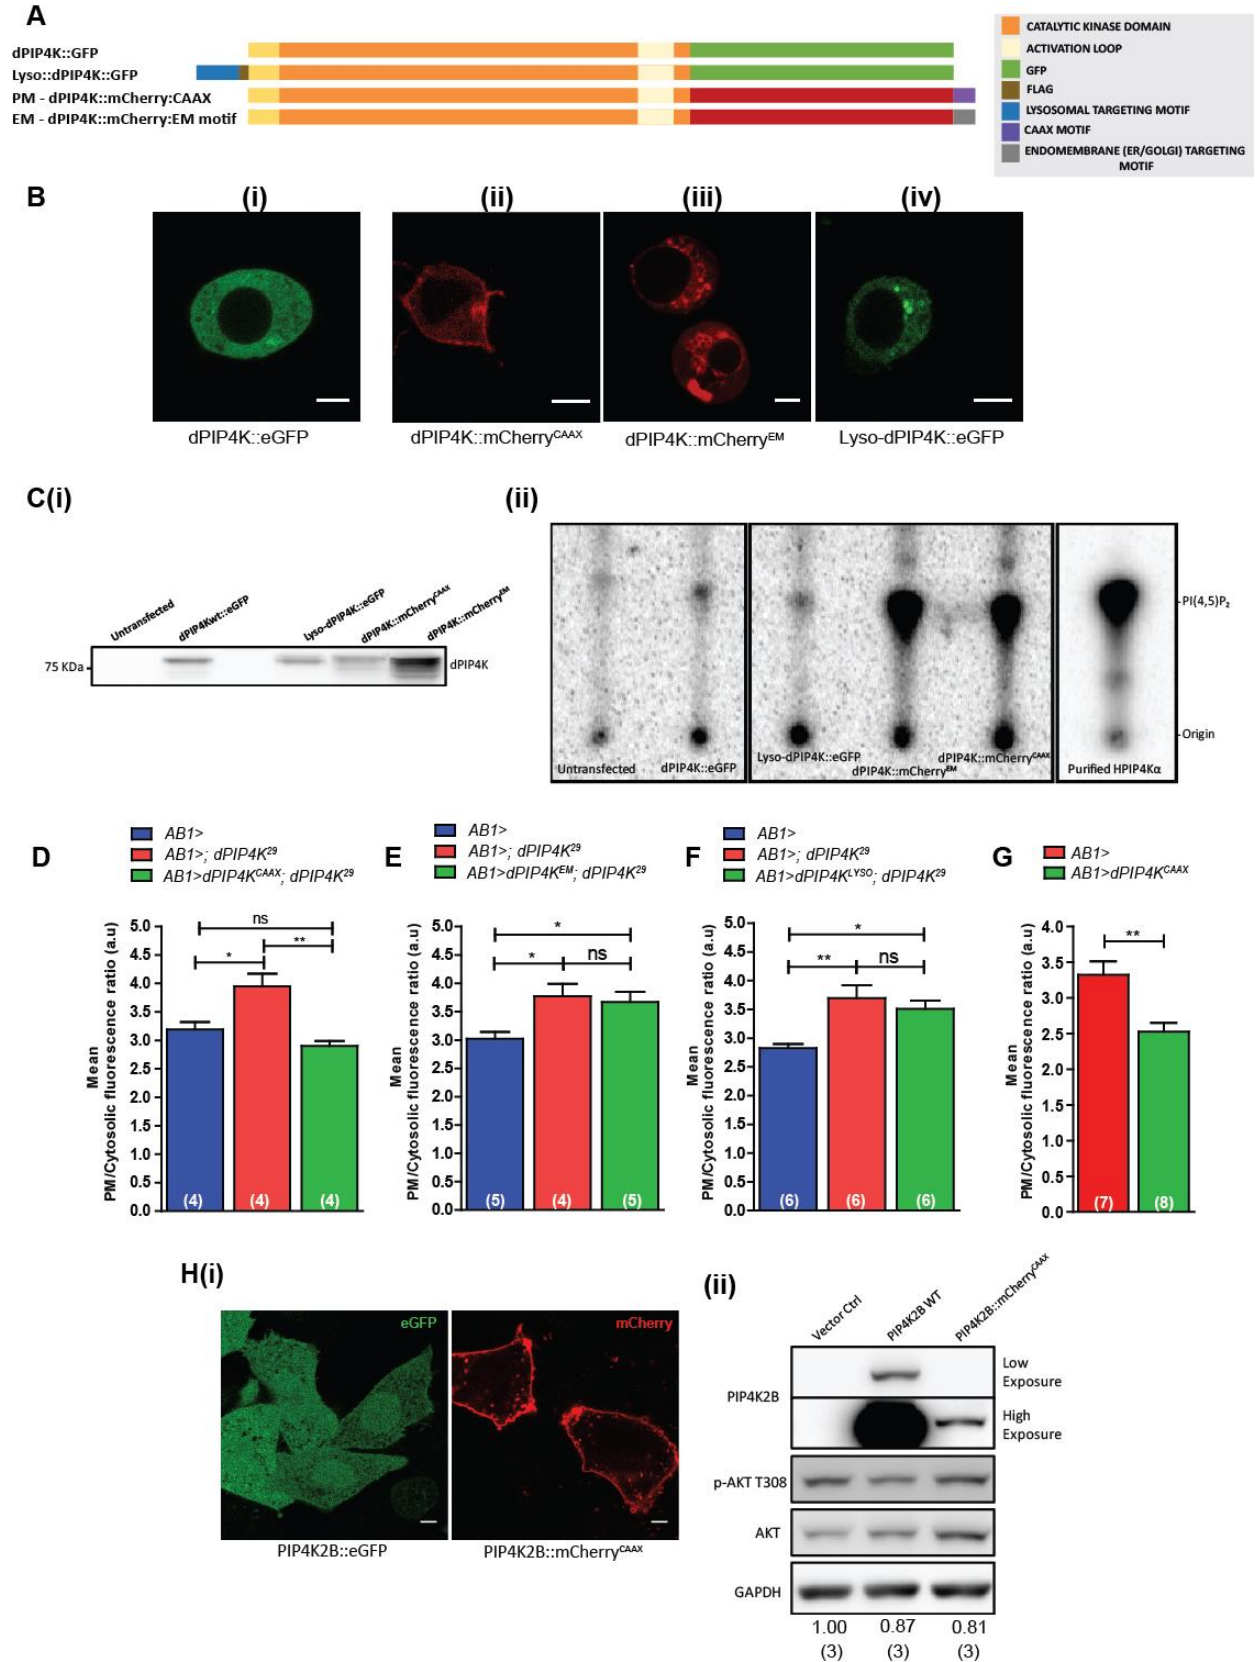

## Fig 5. PIP<sub>4</sub>K functions at the plasma membrane as a negative regulator of insulin receptor signalling

A. Schematic showing constructs that target dPIP<sub>4</sub>K to different subcellular compartments and the motifs used for targeting. B (i-iv). Representative confocal z-projections of S2R+ cells with act-GAL4 expressing various dPIP<sub>4</sub>K constructs (i) wildtype GFP-tagged dPIP<sub>4</sub>K (ii) plasma-membrane (PM) targeted mCherry-tagged dPIP<sub>4</sub>K (iii) mCherry tagged dPIP<sub>4</sub>K targeted to various intracellular membranes inclusive of ER, Golgi and endo-lysosomal system (iv) GFP-tagged dPIP<sub>4</sub>K targeted to the lysosome. C(i). Immunoblots from S2R+ lysates showing the expression of indicated dPIP<sub>4</sub>K constructs that were used in the *in vitro* assay. C(ii). *In vitro* kinase assay from S2R+ cell lysates showing the activity of different overexpressed dPIP<sub>4</sub>K constructs. PIP<sub>3</sub> measurement on insulin stimulation (10 μM) using the PH-GFP-GRP1 probe D-F. in *dPIP4K<sup>29</sup>* salivary glands reconstituted with D. PM targeted dPIP<sub>4</sub>K, E. endo-membrane targeted dPIP<sub>4</sub>K, F. Lysosomal dPIP<sub>4</sub>K, G. upon overexpression of dPIP<sub>4</sub>K::mCherry<sup>CAAX</sup> in the salivary glands. Graphs represent mean ± SEM from at least 4 biological replicates. H(i). Representative confocal z-projections of CHO-IR cells overexpressing GFP-PIP<sub>4</sub>K2B and PIP<sub>4</sub>K2B::mCherry-CAAX. H(ii). Immunoblots from CHO-IR cells expressing PIP<sub>4</sub>K2B constructs stimulated with 1 μM insulin for 10 min. The values below the blots represent the mean pAKT/Total AKT ratio across three independent experiments. Student's t-test used for statistical analysis. \**p-value* < 0.05, \*\**p-value* < 0.01. On each panel, numbers inside the parentheses indicate the no. of biological replicates used for the measurement.

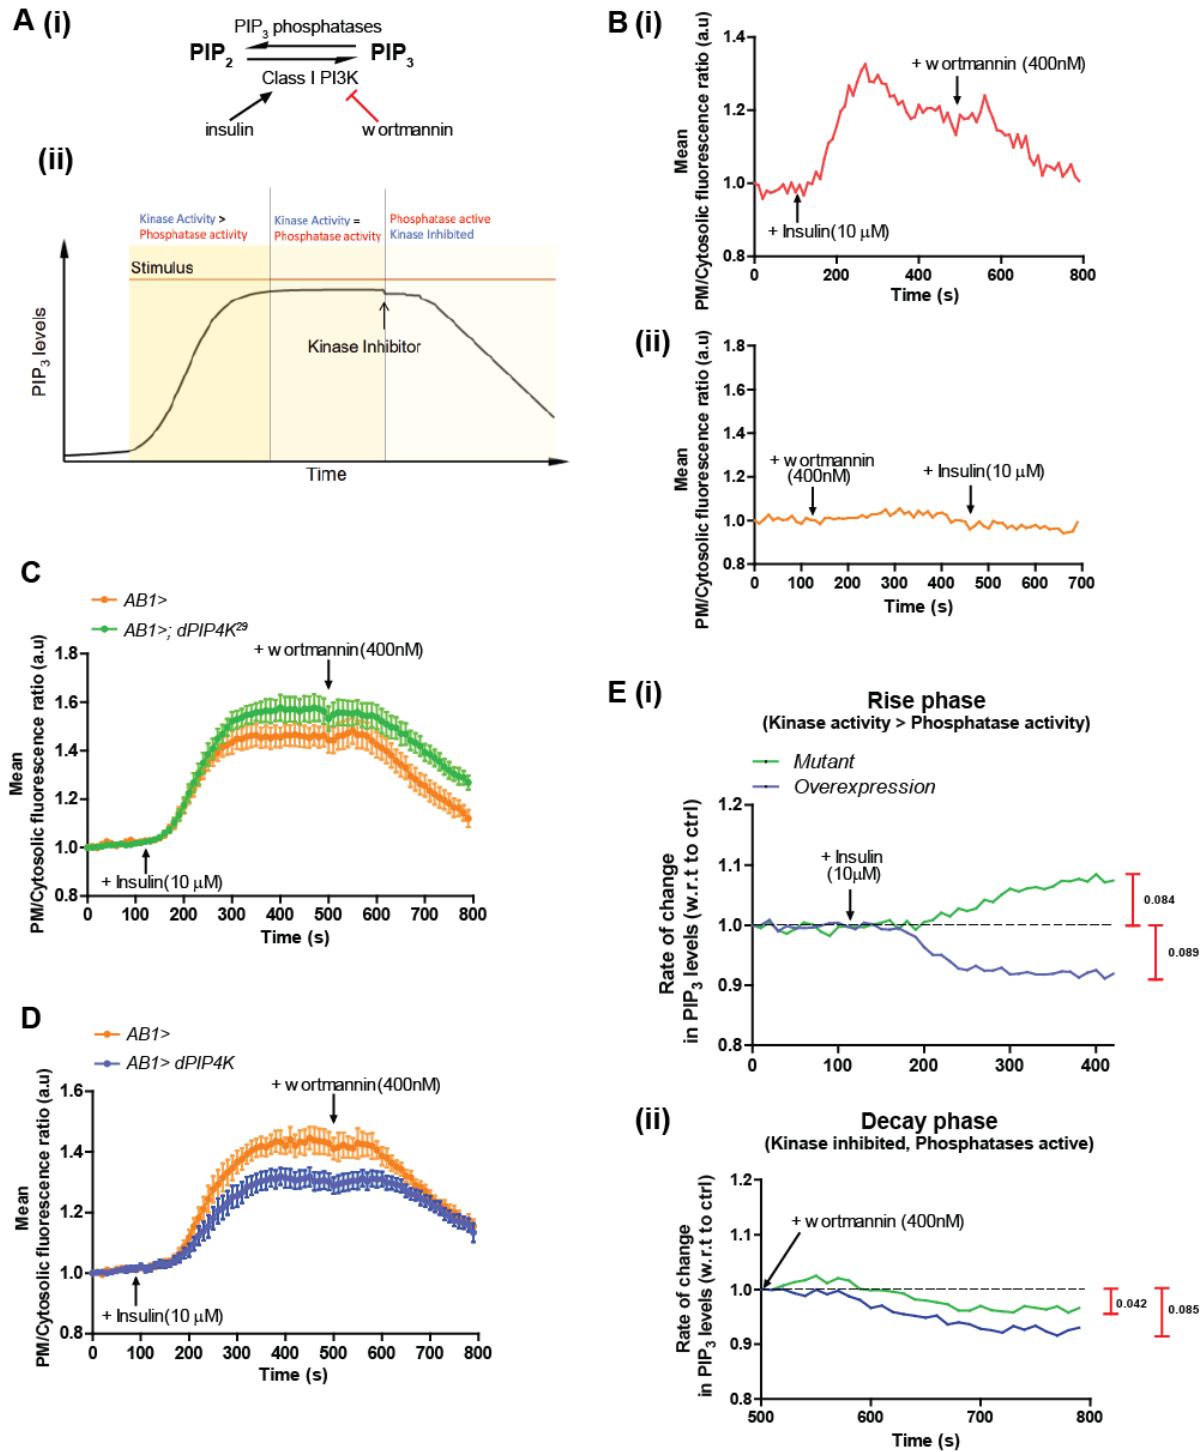



**Fig 6. dPIP<sub>4</sub>K influences PIP<sub>3</sub> turnover.**

(A(i)) Schematic of the reactions that determine PIP<sub>3</sub> turnover at the plasma membrane. Insulin stimulates PI<sub>3</sub>K activation. Wortmannin inhibits PI<sub>3</sub>K activity irreversibly. (A(ii)) Live imaging assay protocol to follow PIP<sub>3</sub> dynamics with three phases as depicted. (B(i)) A single trace from live imaging of salivary glands expressing GFP-PH-GRP<sub>1</sub> probe showing the changes in the plasma-membrane to cytosolic ratio of the probe fluorescence over time. (B(ii)) Wortmannin addition (400nM) completely blocks insulin (10μM) induced PIP<sub>3</sub> production. (C) and (D) Average traces of GFP-PH-GRP<sub>1</sub> fluorescence ratio from multiple imaging runs for the genotypes indicated (N=7 for all genotypes). The two experiments were performed at different times, hence controls samples were repeated. (E(i) and (ii)) Curves depict changes in slopes of fluorescence calculated by taking ratios of fluorescence from test genotypes to that in controls. The maximal difference is indicated alongside the graph.

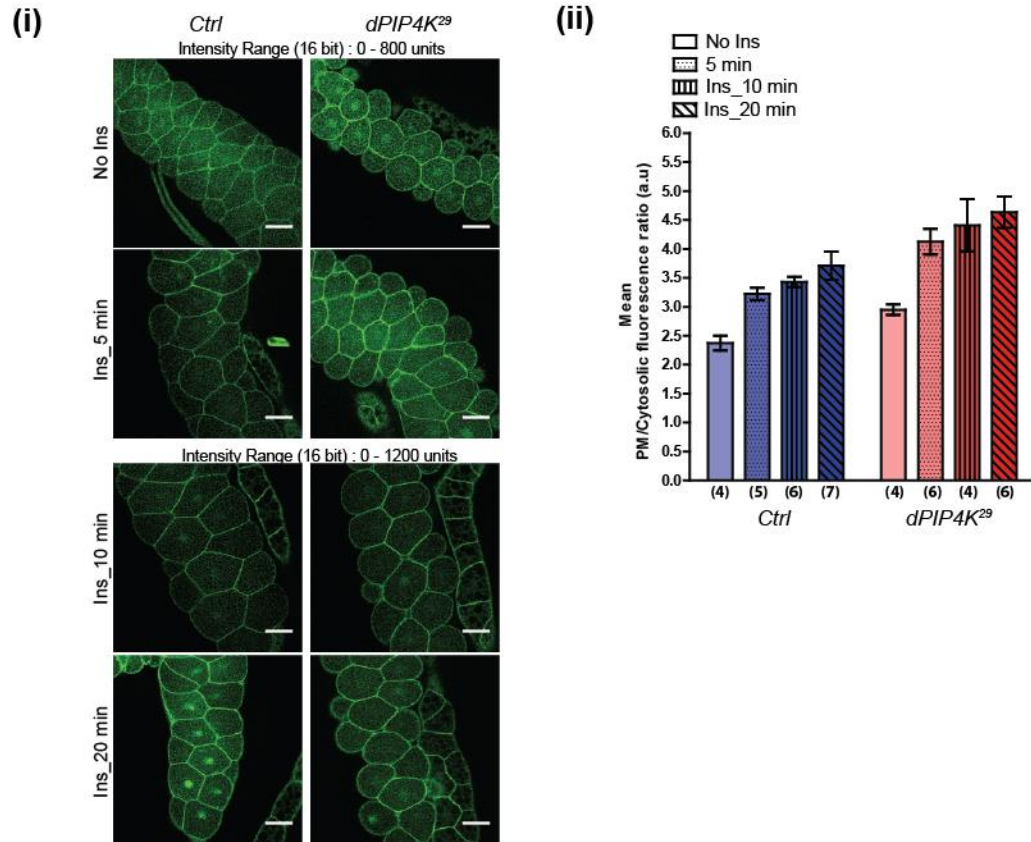

Sharma, et.al. Fig. 6, Supplement 1

Fig. 6, Supplement 1

A. (i) Confocal z-projections of salivary glands expressing GFP-PH-GRP1 in wildtype and *dPIP4K<sup>29</sup>* backgrounds. Salivary glands dissected from wandering 3 rd instar larvae were stimulated or not with 10  $\mu$ M bovine insulin for indicated times, fixed and imaged. (ii) Relative PIP<sub>3</sub> levels were measured as a ratio of mean fluorescence intensity at the plasma membrane to that in the cytosol. Graphs represent mean  $\pm$  SEM. On each panel, numbers inside the parentheses indicate the no. of biological replicates used for the measurement.

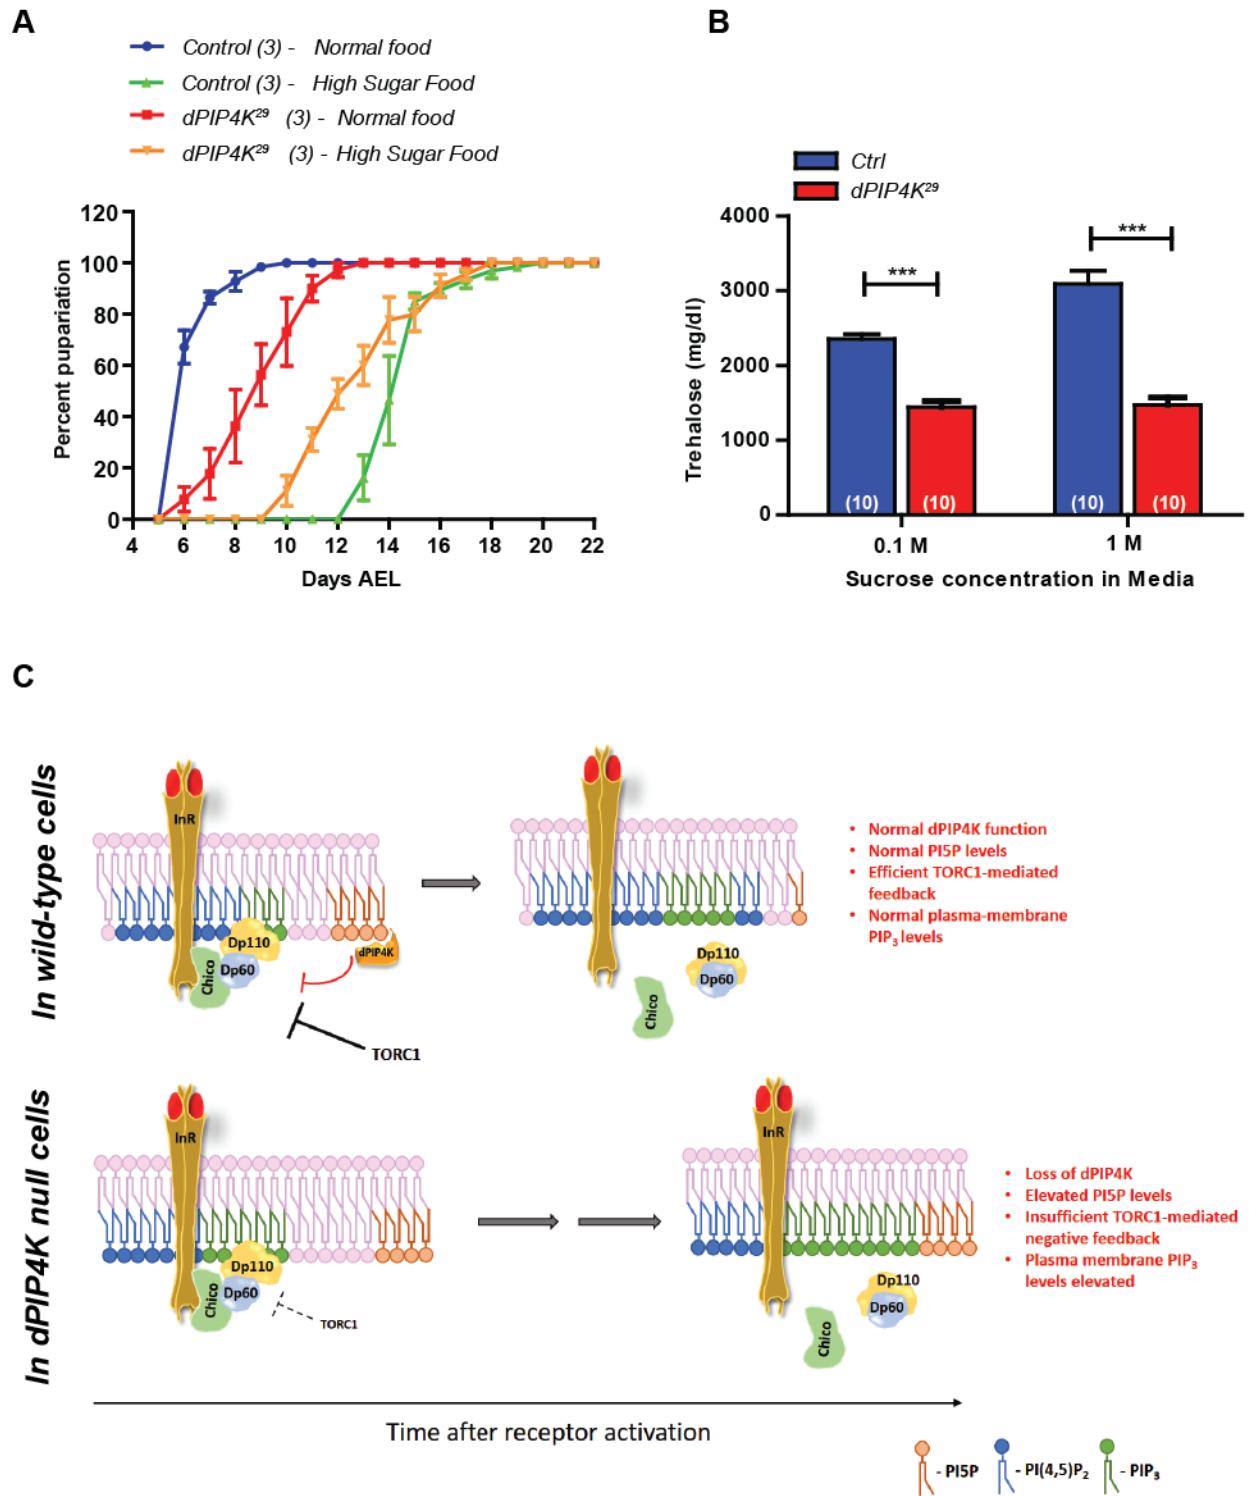

**Fig 7. dPIP4K modulates the acquisition of insulin resistance upon high dietary sugar intake.**

A. The graph represents the mean percentage of pupariation (After egg laying, AEL) observed over time on indicated diets. Data collected from 3 independent batches of about 15-25 larvae per batch. Error bars indicate SEM. B. Mean hemolymph trehalose levels measured of hemolymph pooled from 5-8 larvae each per genotype. Error bars represent SEM. *Student's t-test* used for statistical analysis. \*\*\**p-value* <0.001. On each panel, numbers inside the parentheses indicate the no. of biological replicates used for the measurement. C. A schematic of regulation of PIP<sub>3</sub> levels by dPIP4K upon insulin stimulation. In wild-type cells, insulin-induced activation of the receptor triggers dPIP4K activity that prevents PI5P elevation at plasma membrane. Eventually, the negative feedback via TORC<sub>1</sub> activity also sets in. These events act together and keep PIP<sub>3</sub> levels in check. Upon loss of dPIP4K in cells, PI5P accumulates and cells show increased PIP<sub>3</sub> levels upon insulin stimulation as a result of increased PI<sub>3</sub>K activity which cannot be restored via TORC<sub>1</sub>-mediated negative feedback.
